# Supplementary material for: Improving the EMI shielding of graphene oxide (GNO)-coated glass-fiber–GNO–MA-grafted polypropylene (PP) composites and nylon 1D–2D nanocomposite foams
Source: Royal Society of Chemistry journal article supplement (doi:10.1039/d1ra09124g), 2022-01-01
Supplement: d1ra09124g1.pdf [file d1ra09124g1.pdf]

## Improving EMI shielding of graphene oxide (GNO) coated glass-fiber-GNO-MA-grafted Polypropylene composites, and Nylon-1D, 2D composite foams.

Supplementary

### 1. Schemes

Nylon based composites preparation

#### 2.1.5. Preparation of nylon-graphene-copper nanoplate composite (NGCu)

The graphene and Cu nanoplate were added together into a Teflon bottle and shake well by hand and then filled into the mold which already consist of 40 g of nylon-carbon fiber composition. Finally, the composition was pressed for 5 min and heated at 290°C for 2 h. The cooled composite used for further analysis.

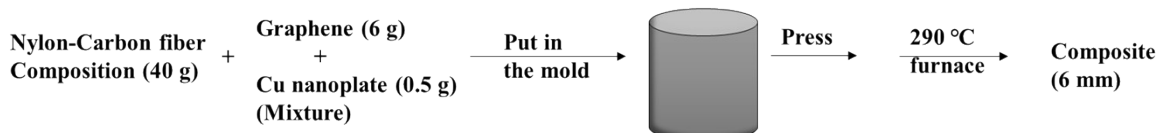

Scheme S1. Preparation of NGCu

#### 2.1.6. Preparation of nylon-graphene-CNT NGT

The graphene and CNT were added together into a Teflon bottle and shake well by hand and then filled into the mold which already consist of 40 g of nylon-carbon fiber composition. Finally, the composition was pressed for 5 min and heated at 290°C for 2 h. The cooled composite used for further analysis.

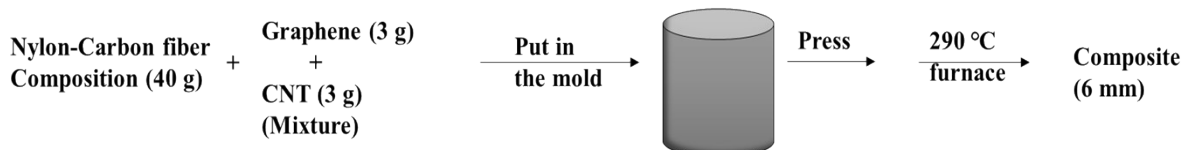

Scheme S2. Preparation of NGT

#### 2.1.7. Preparation of nylon-CF-graphene-CNT composite (NFGT).

The graphene and Cu nanoplate were added together into a Teflon bottle. The 40 g of nylon-carbon fiber composition, and Graphene-CNT mixture were equally divided into three portions. Then one portion of nylon-carbon fiber composition, and Graphene-CNT mixture was filled into the mold and then placed one layer of carbon fabric. This process was repeated one more time and ~2 mm gap was maintained between each carbon fabric. Finally, the composition was pressed for 5 min and heated at 290°C for 2 h. The cooled composite used for further analysis.

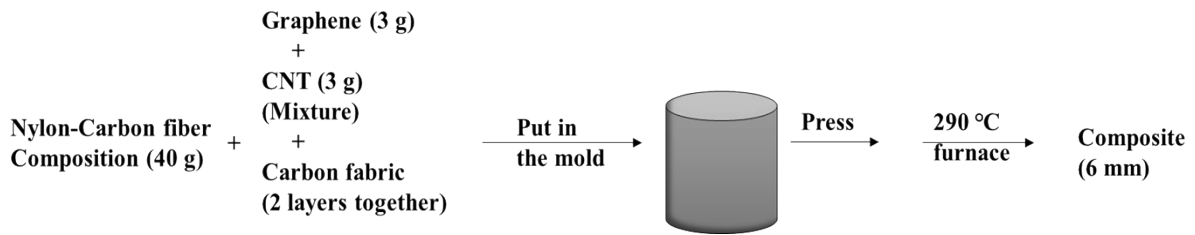

**Scheme S3.** Preparation of NFGT

#### 2.1.8. Preparation of Nylon-CF-cobalt nanoplate coated CF-CNT composite (NFCoT)

The 40 g of nylon-carbon fiber composition, and Graphene were equally divided into four portions. Then one portion of nylon-carbon fiber composition, and Graphene was filled into the mold and then placed one layer of carbon fabric. This process was repeated two more time and ~1 mm gap was maintained between each carbon fabric (Co coated carbon fabric placed between 2 carbon fabric). Finally, the composition was pressed for 5 min and heated at 290°C for 2 h. The cooled composite used for further analysis.

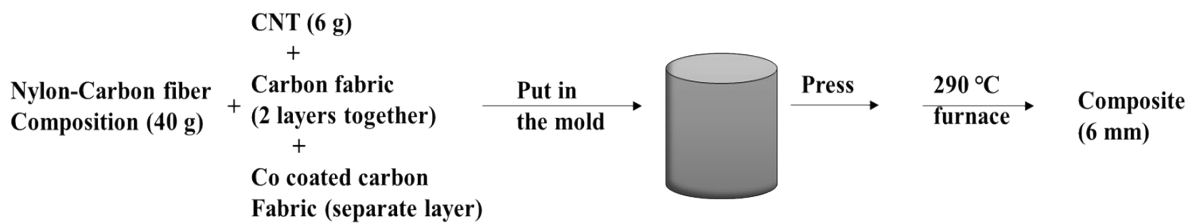

**Scheme S4.** Preparation of NFCoT

#### 2.2.1. Surface modification of glass fiber (GF)

Drying is done in vacuum oven and all process can be done in 1 day

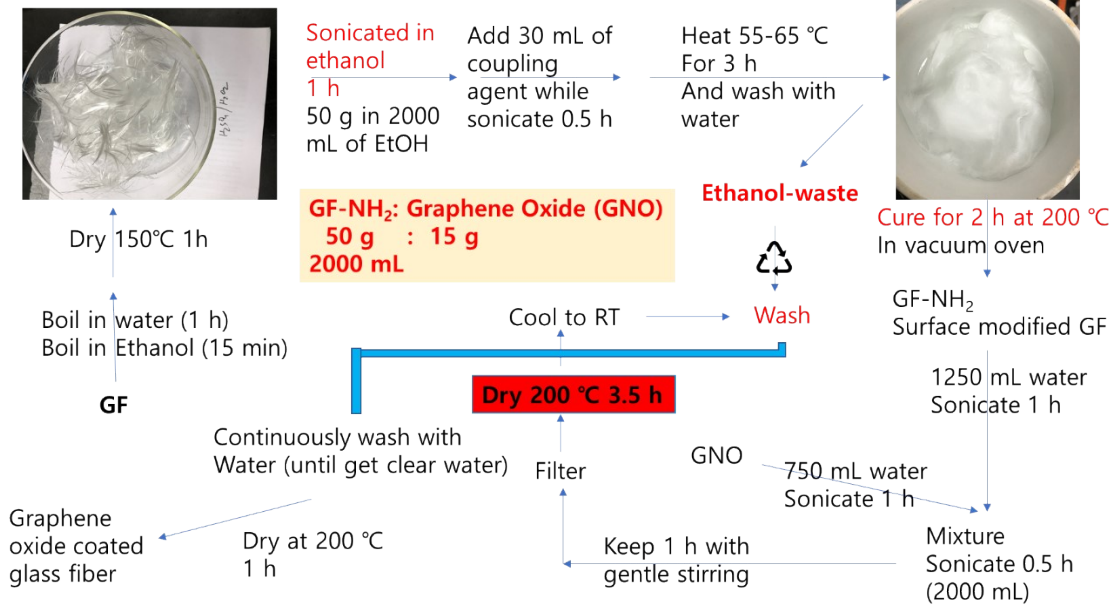

**Scheme S5.** The schematic representation of GF-NH<sub>2</sub> synthesis

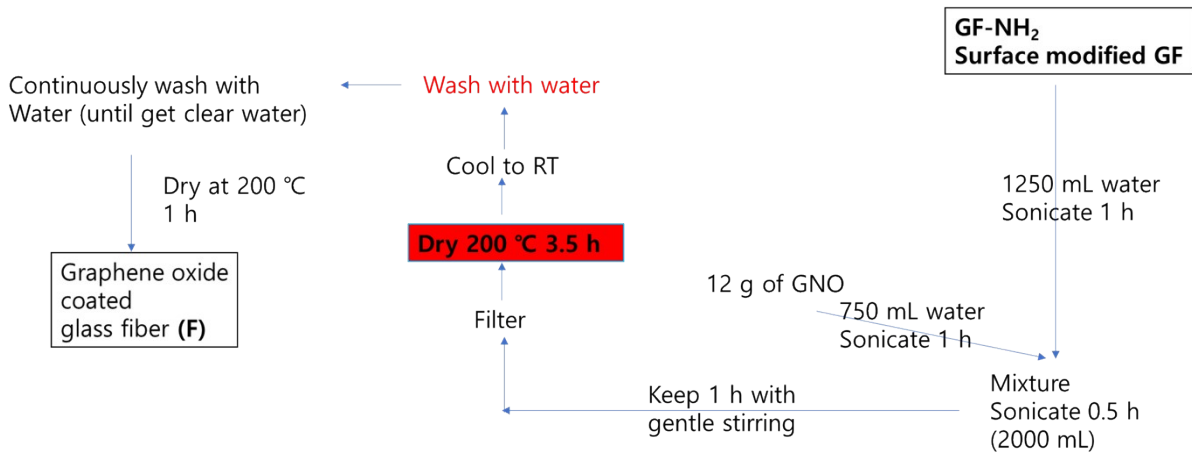

**Scheme S6.** The schematic representation of GNO coated GF synthesis.

#### 2.2.4.2. GGF-maleic anhydride grafted polypropylene graphene oxide composite (GFGMAPP) (model 1)

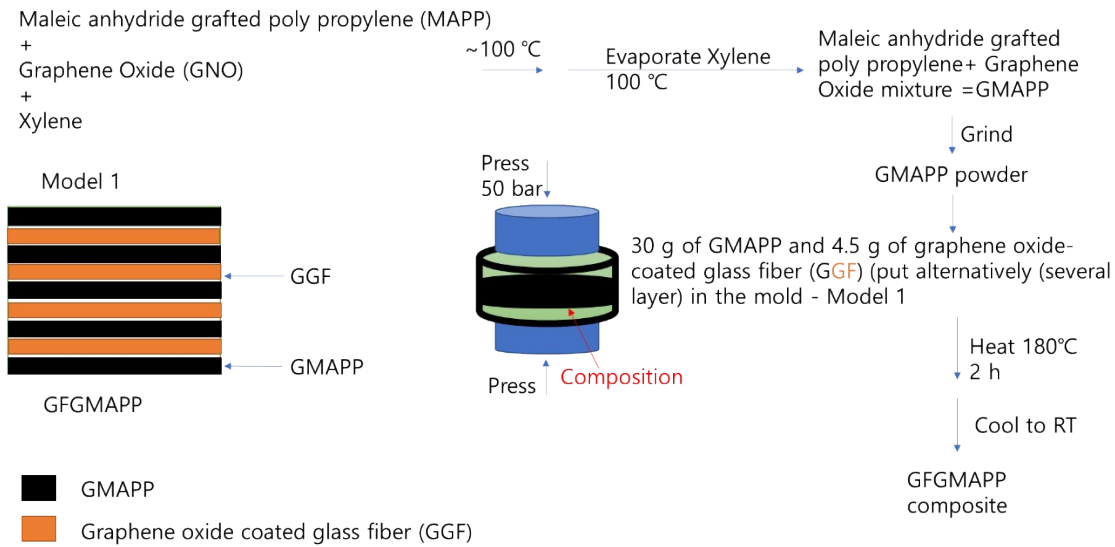

**Scheme S7.** Schematic representation of model 1.

### 2.2.4.3. GGF-CF-maleic anhydride grafted polypropylene graphene oxide composite (GFCFGMAPP ) (model 2)

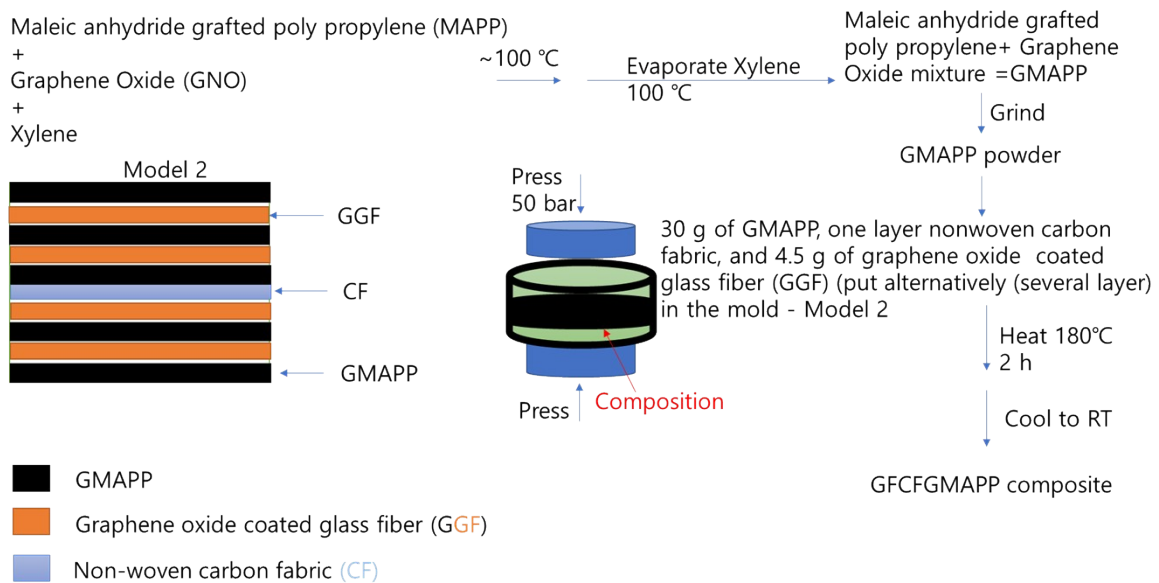

**Scheme S8.** Schematic representation of model 2.

### 2.2.4.4. GGF-CF-Fe-maleic anhydride grafted polypropylene graphene oxide nanoplate composite (GFCFFeGMAPP) (model 3)

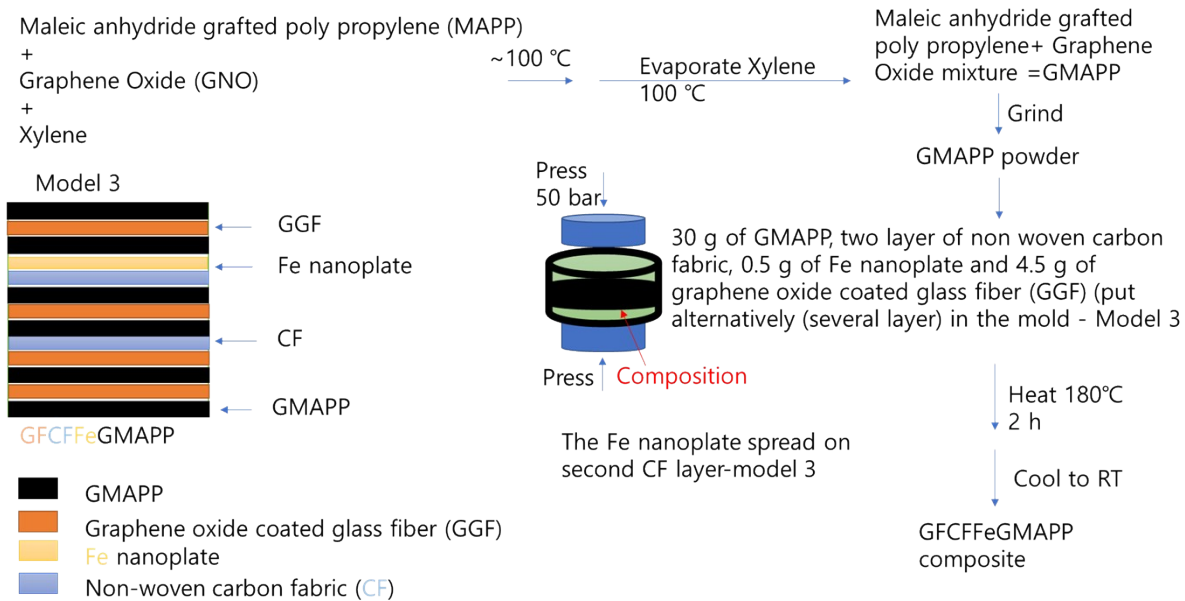

**Scheme S9.** Schematic representation of model 3.

## 2. Figure

### Mold structure

The mold has been designed by us for the composite preparation shown in figure 3a-b. The inner diameter of the mold 8 cm and height is 6 cm. The metal block A set in one side and the composite was filled via other-side and finally pressed. The metal ring D is used to remove the A after the heating process.

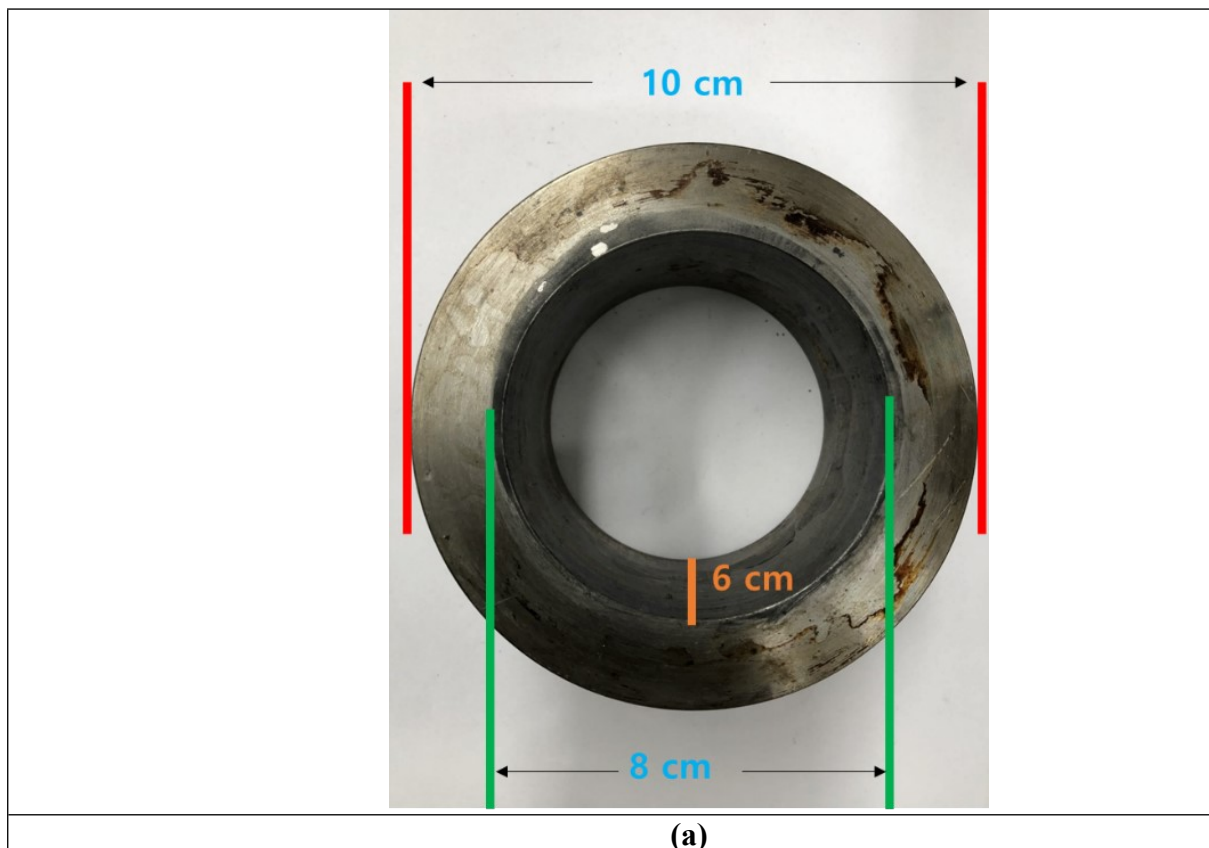

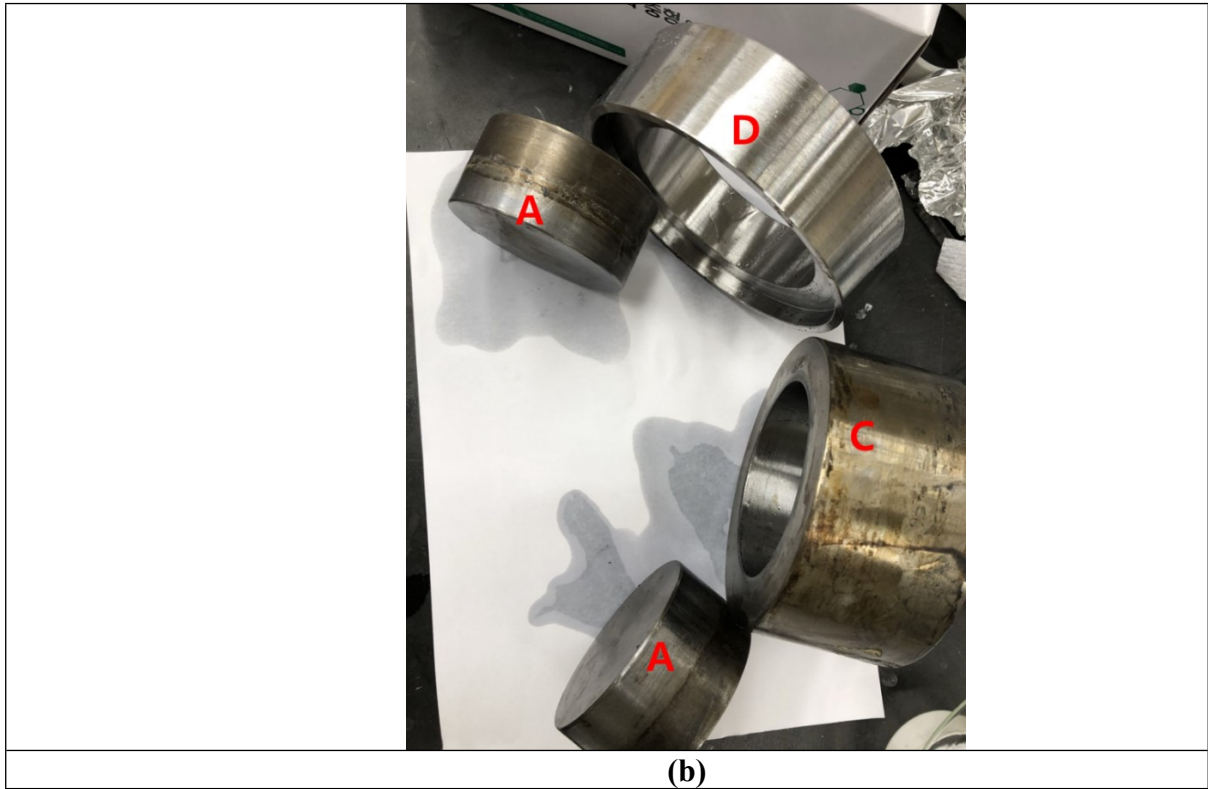

**Figure S1.** The structure of the mold used

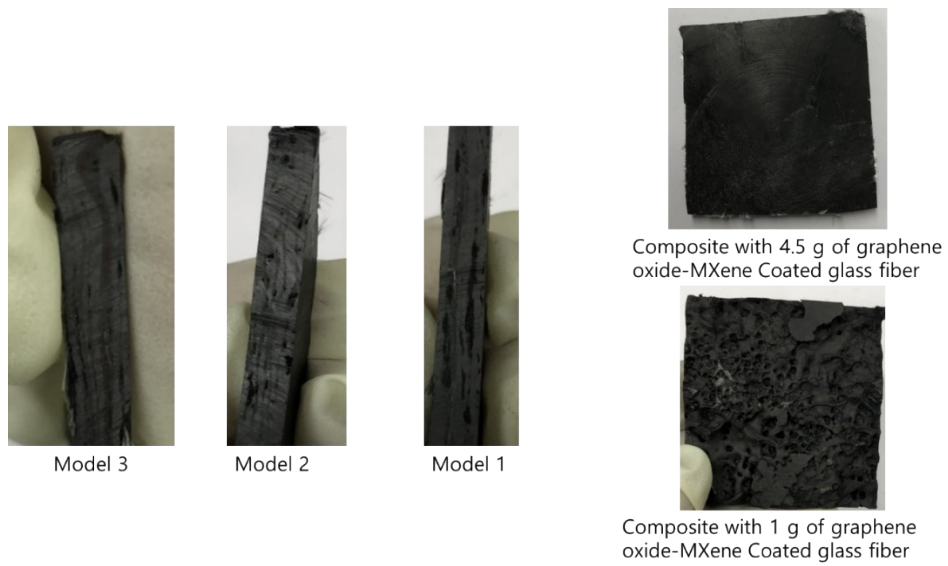

**Figure S2.** The photography of the composites.

### 3.1.3. XPS analysis

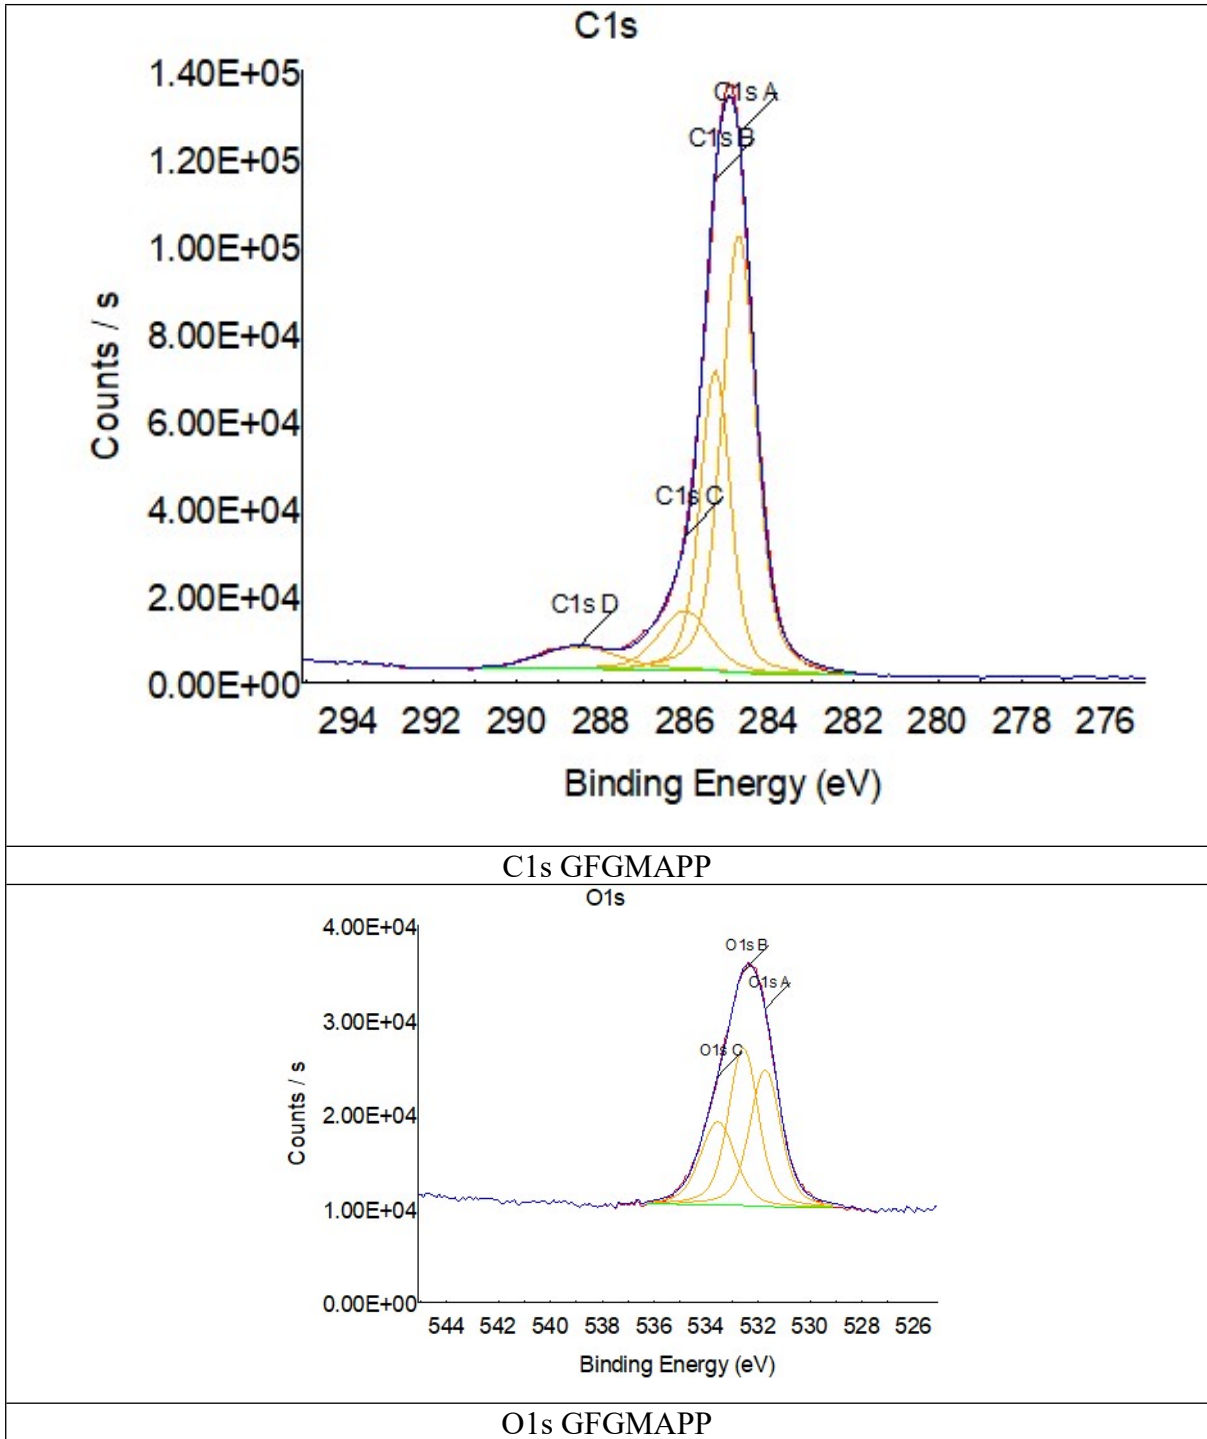



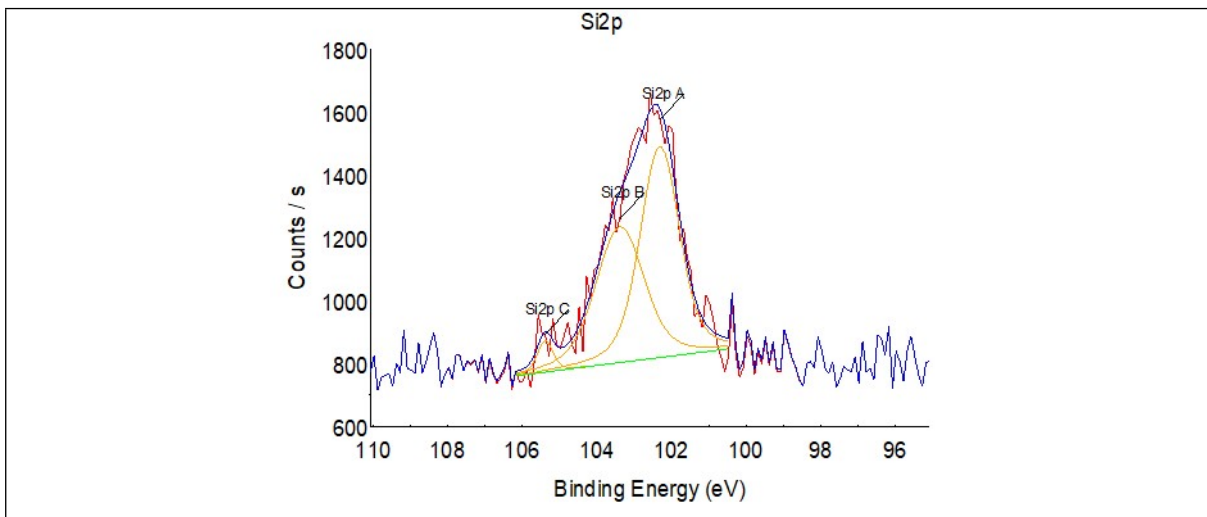

**Si2p GFGMAPP**

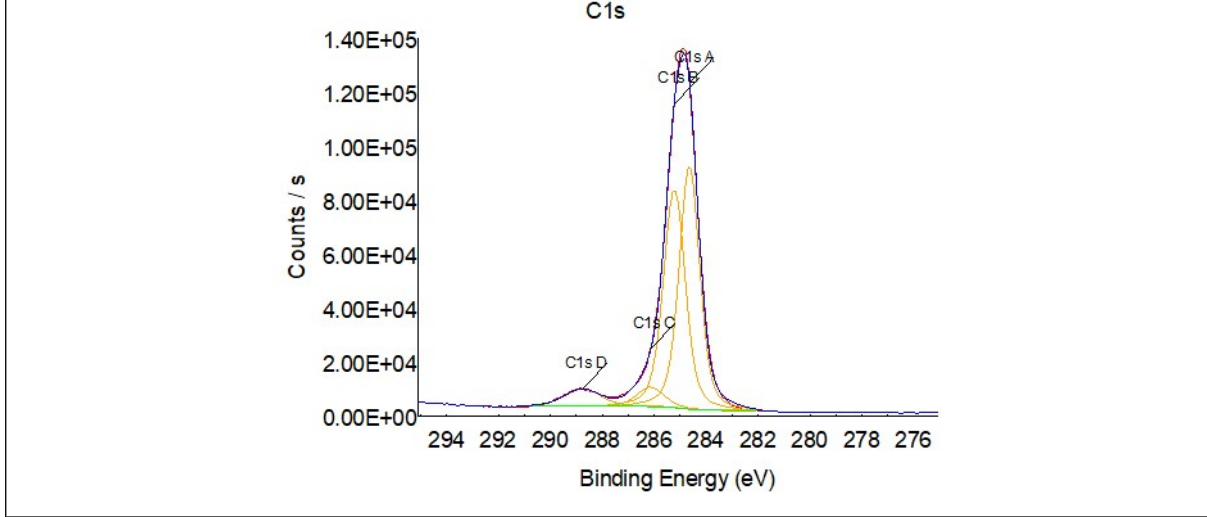

**C1s GFCFGMAPP**

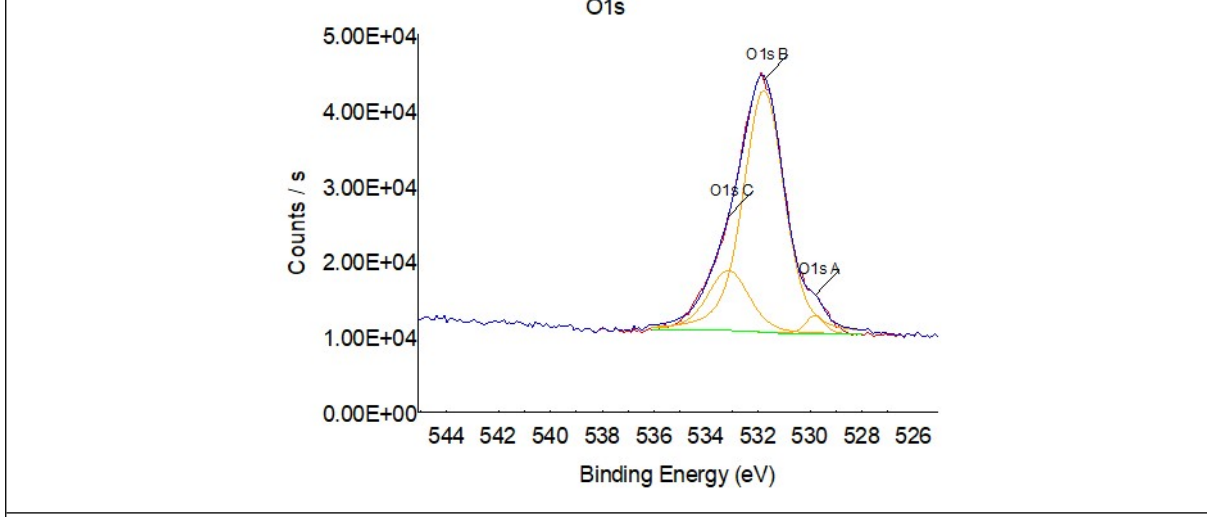

**O1s GFCFGMAPP**

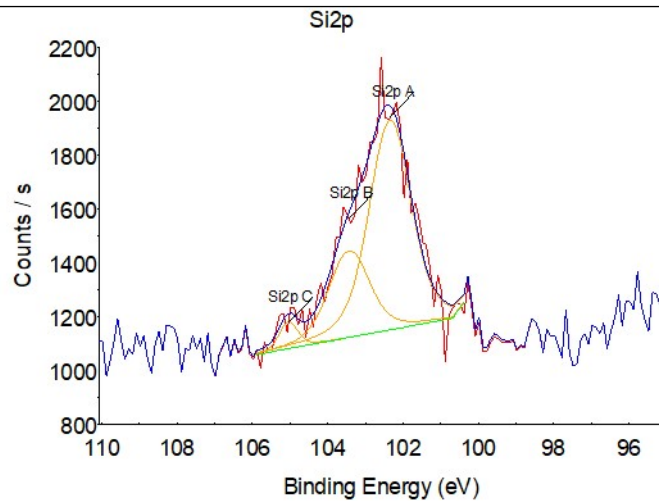

Si2p GFCFGMAPP

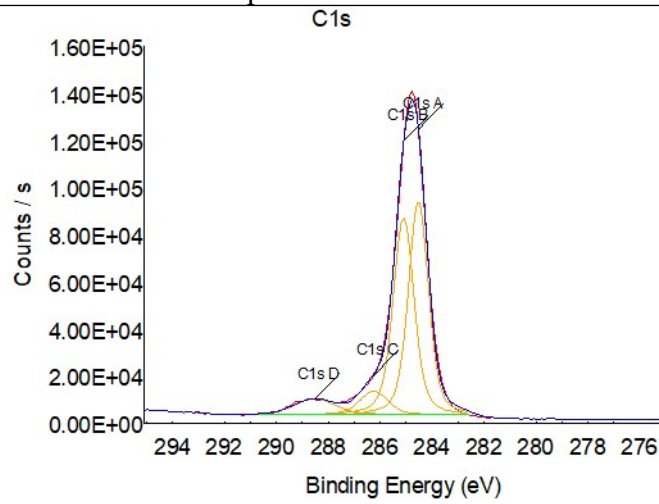

C1s GFCFFeGMAPP

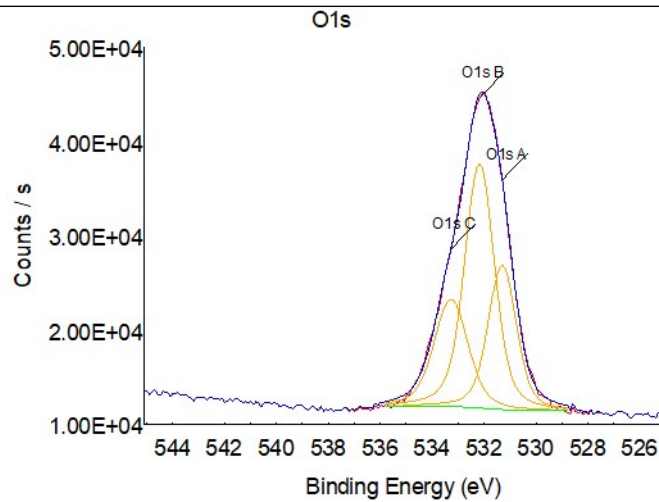

O1s GFCFFeGMAPP

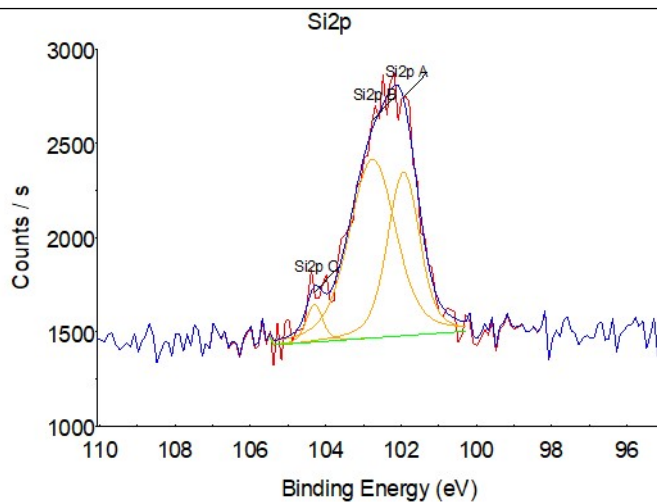

Si2p GFCFFeGMAPP

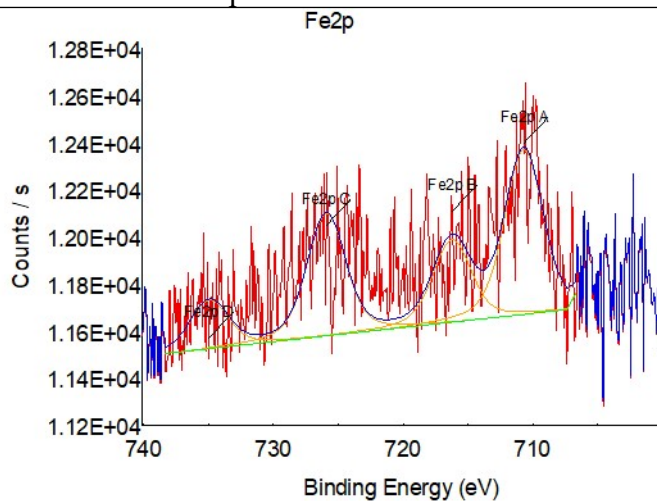

Fe2p GFCFFeGMAPP

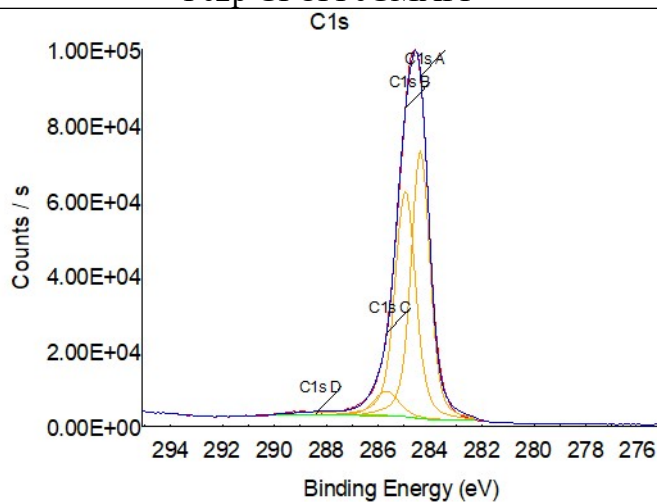

C1s GMAPP

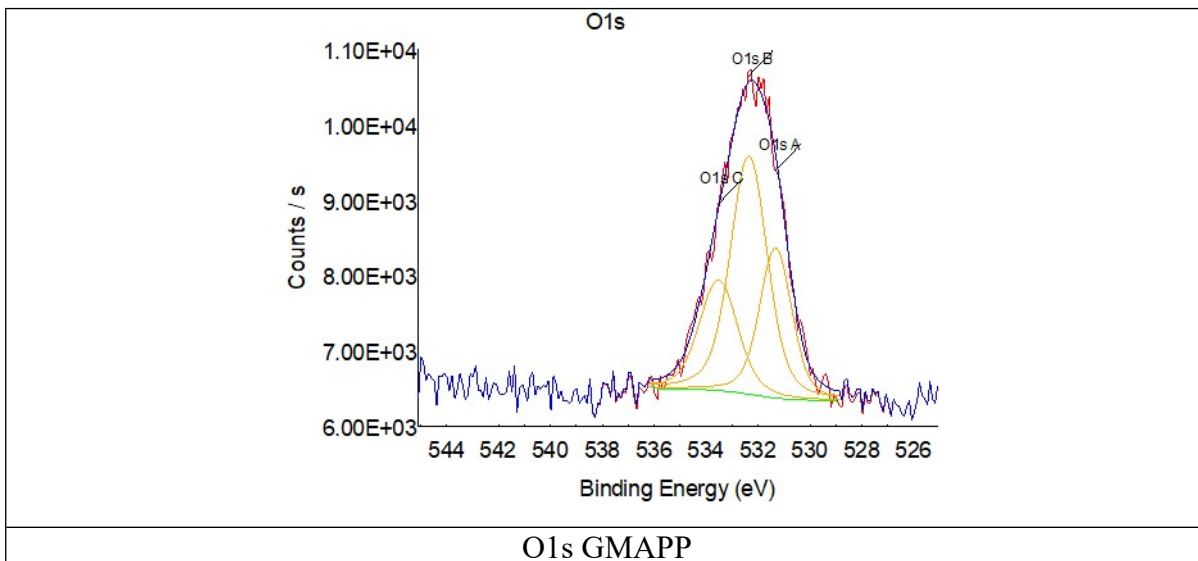

**Figure S3.** XPS fitting curve of PP composites

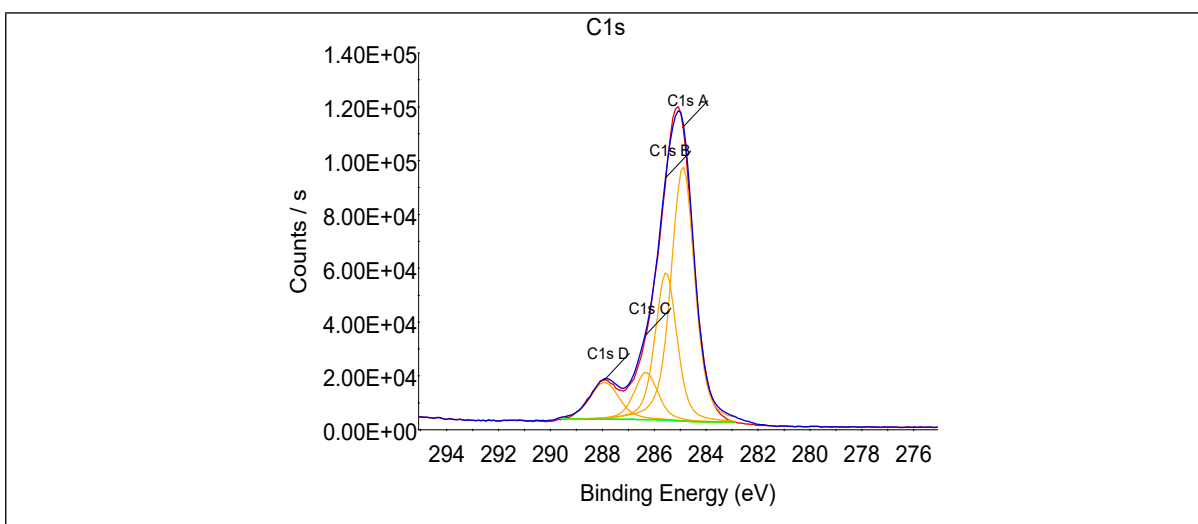

**C1s of NFCoT**

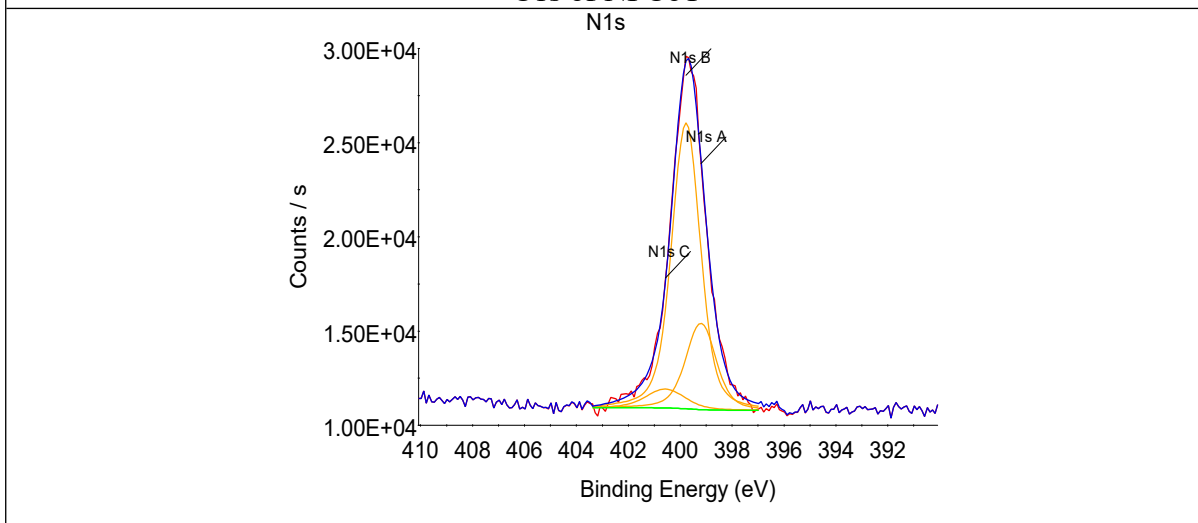

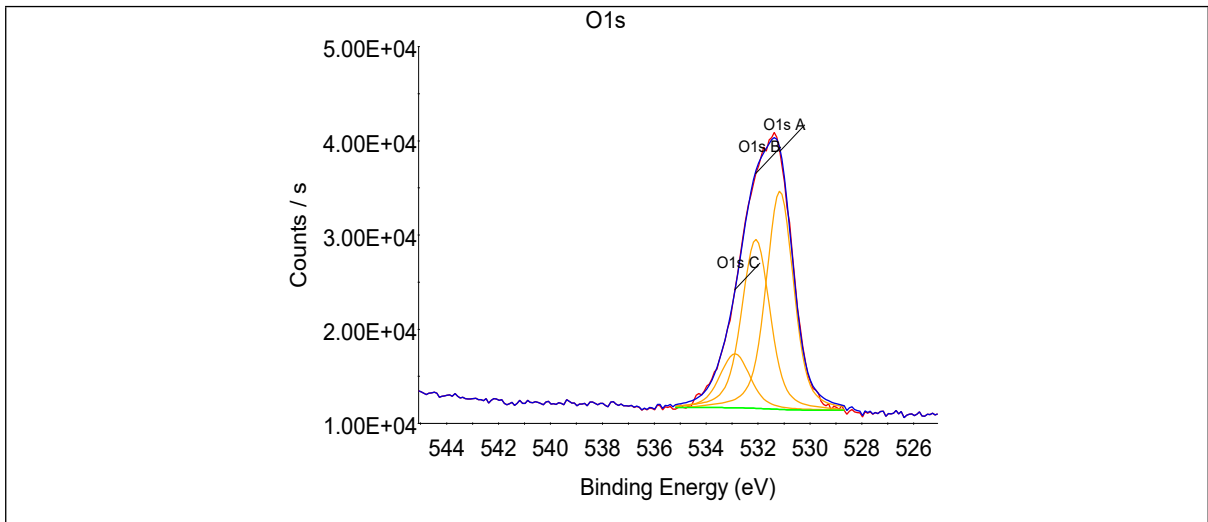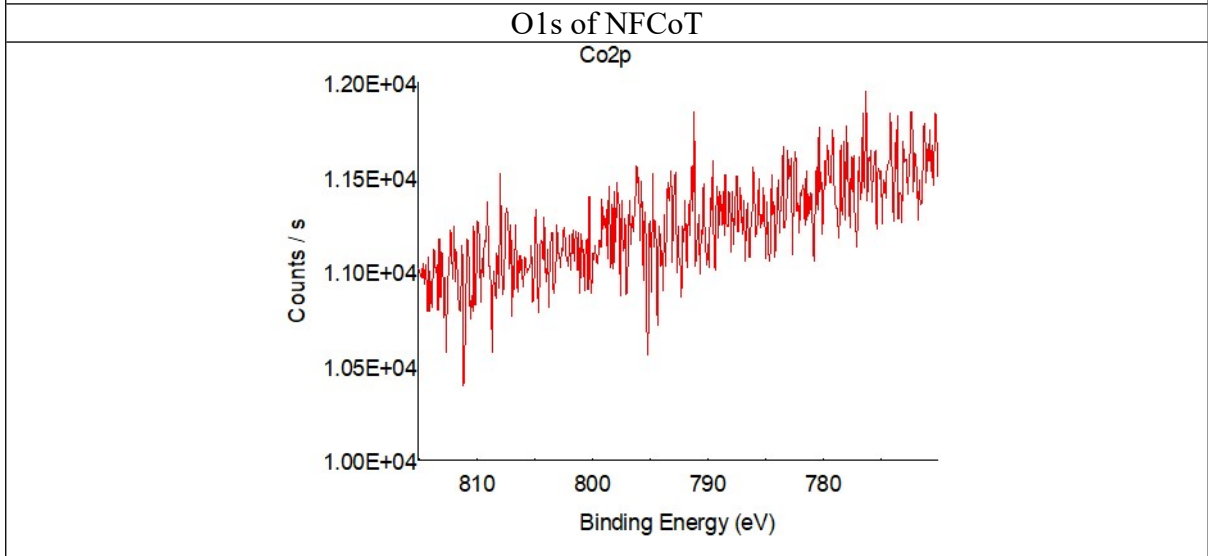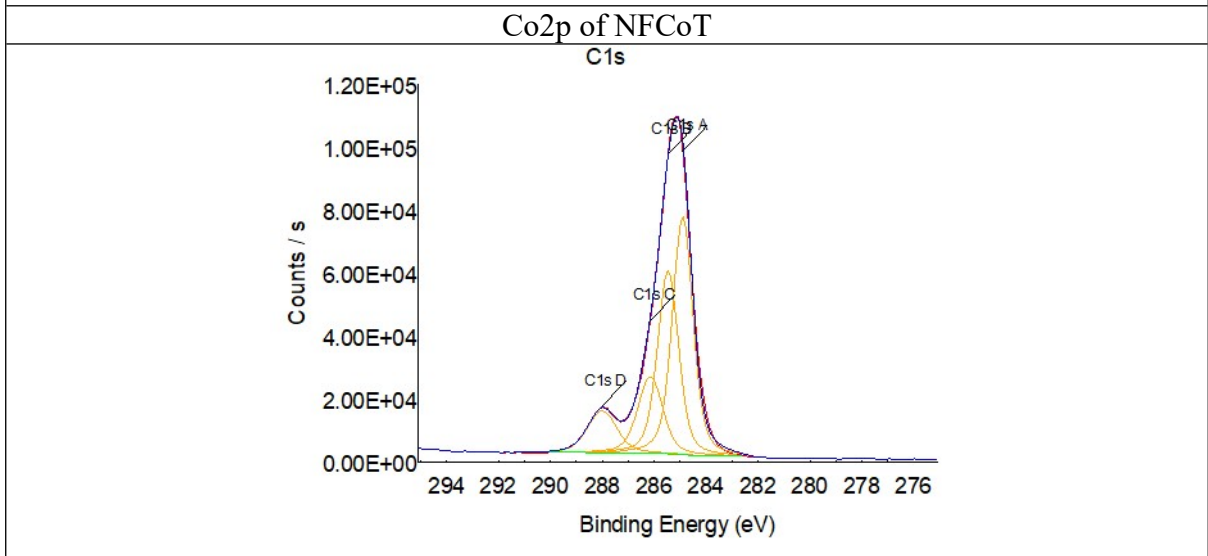

C1s of NFGT

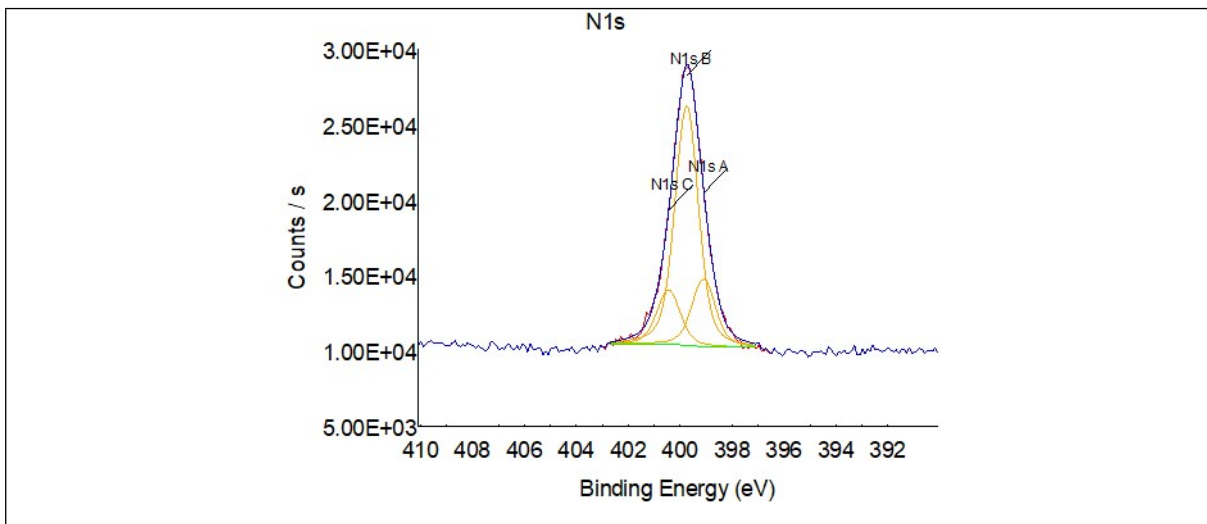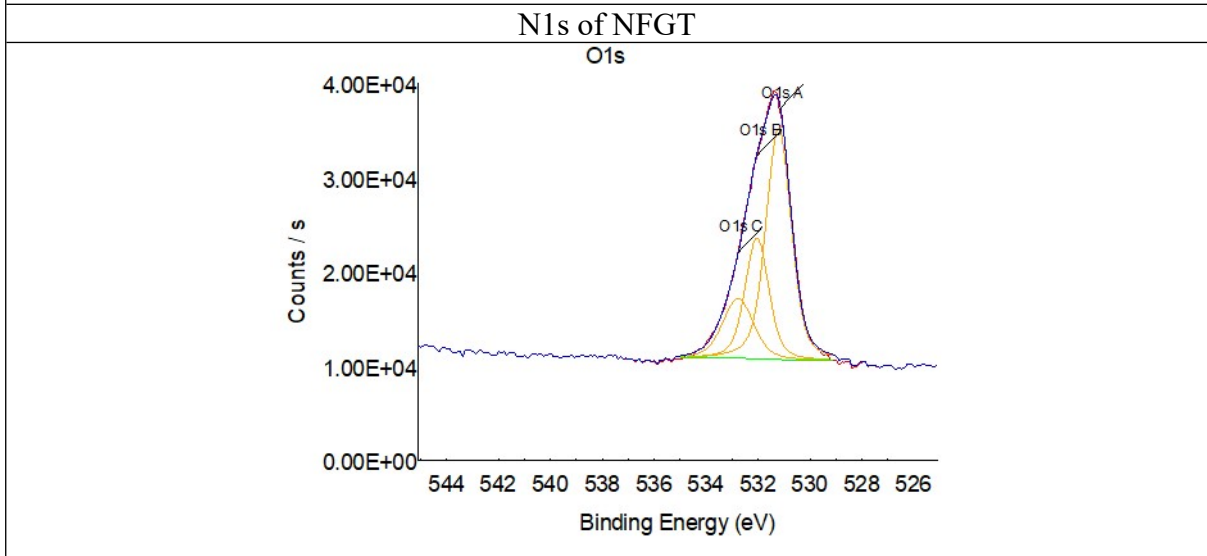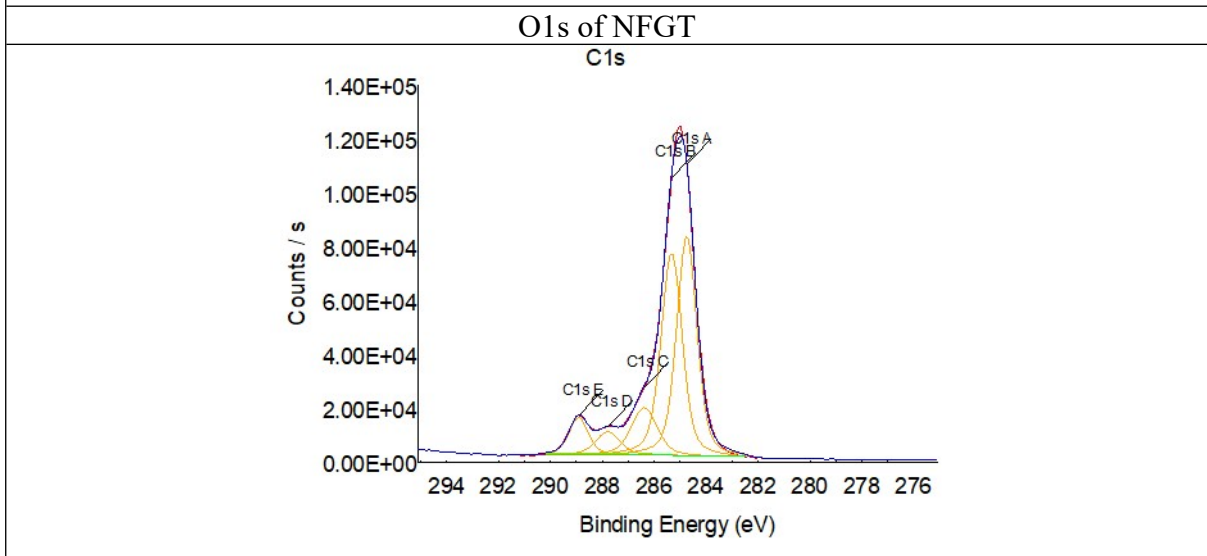

C1s of NGT

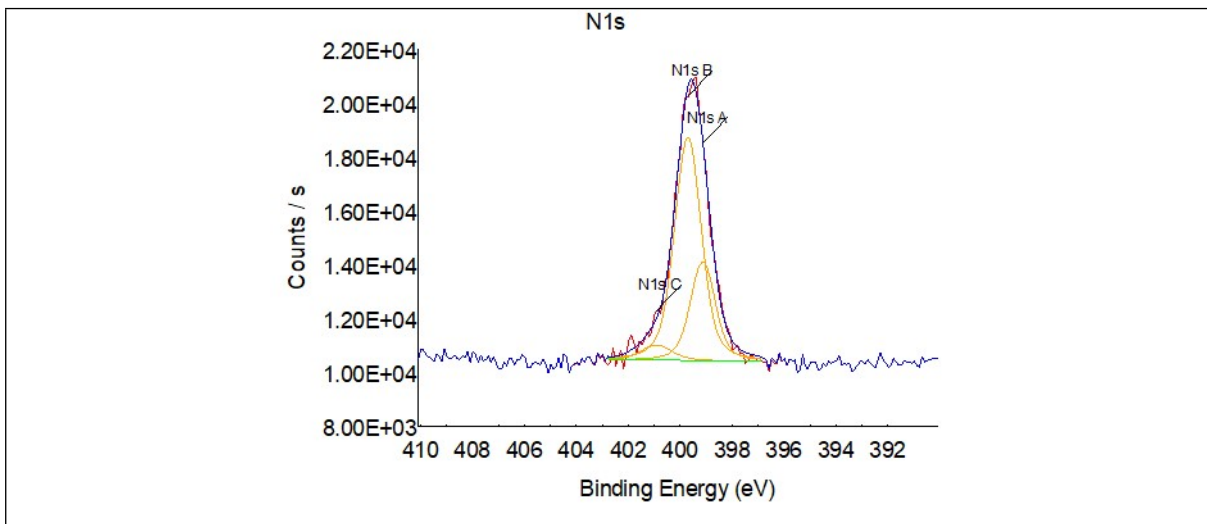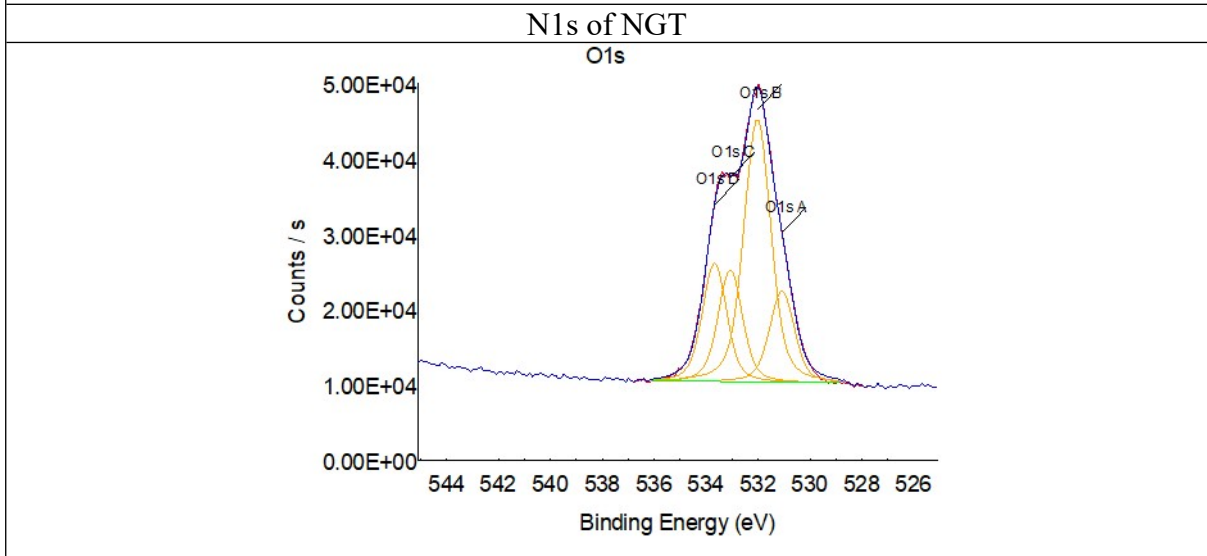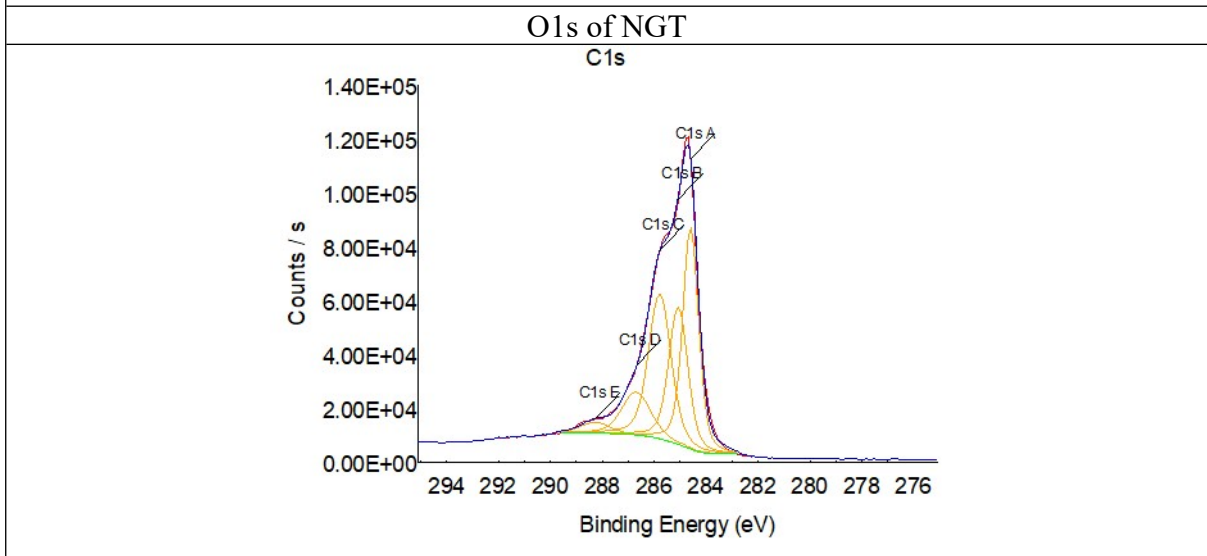

C1s of NGCu

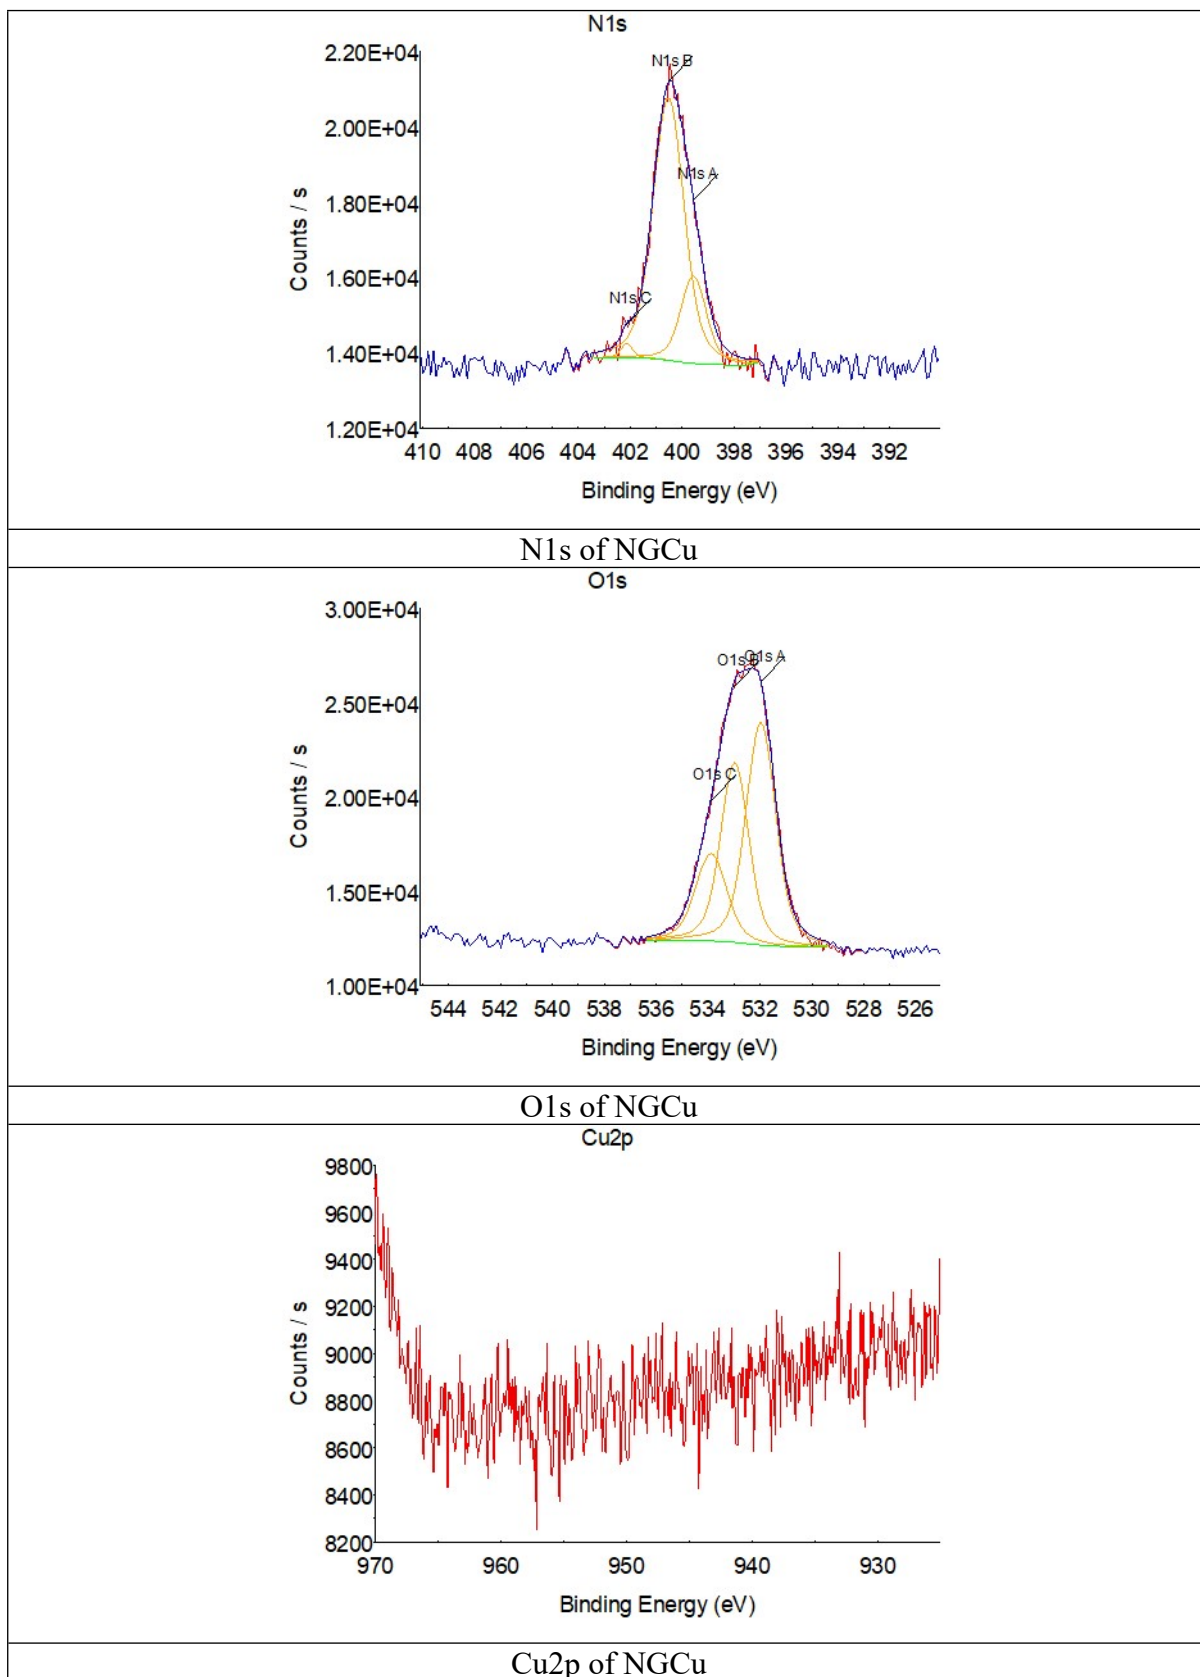

**Figure S4.** XPS fitting curve of nylon-based composite.



EMI shielding of the composites

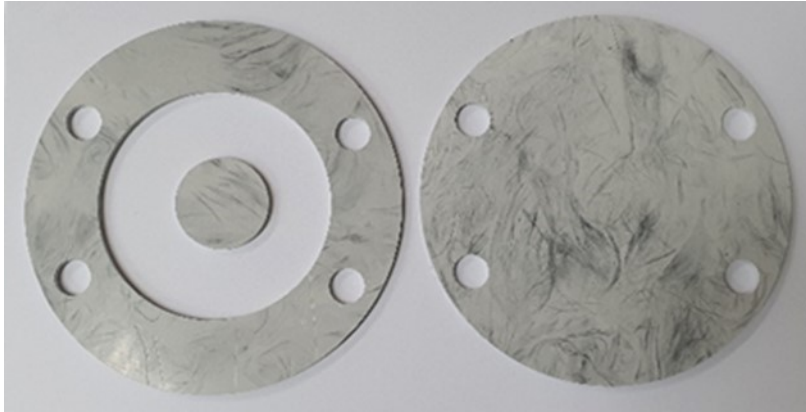

**Figure S5.** Polypropylene GGF composite

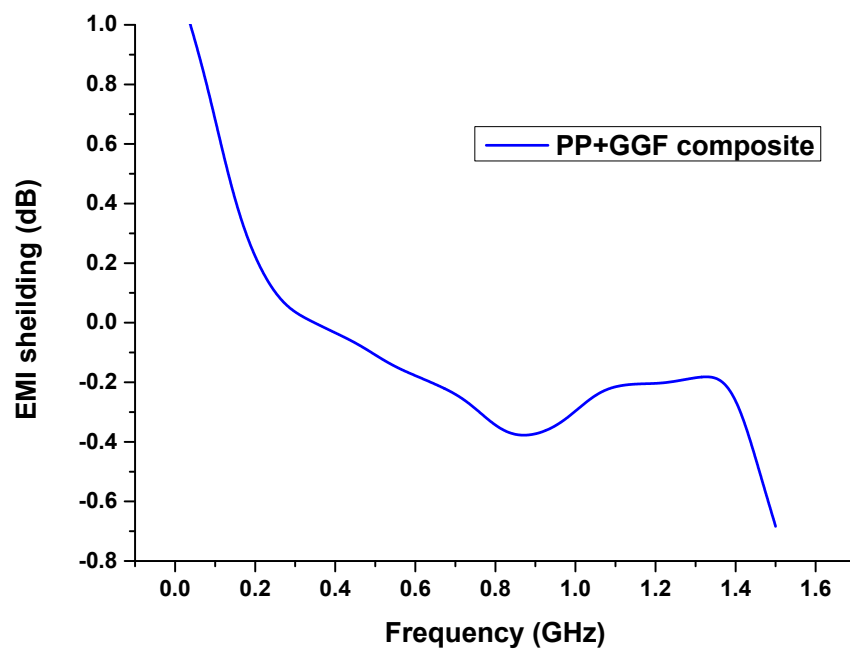

**Figure S6.** EMI-SE of Polypropylene GGF composite

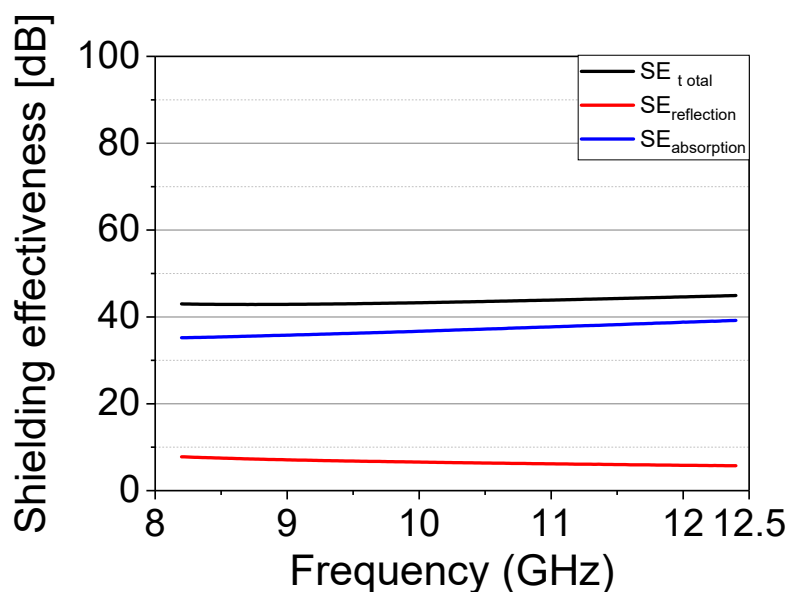

Figure S7. EMI shielding of nylon composite without fillers

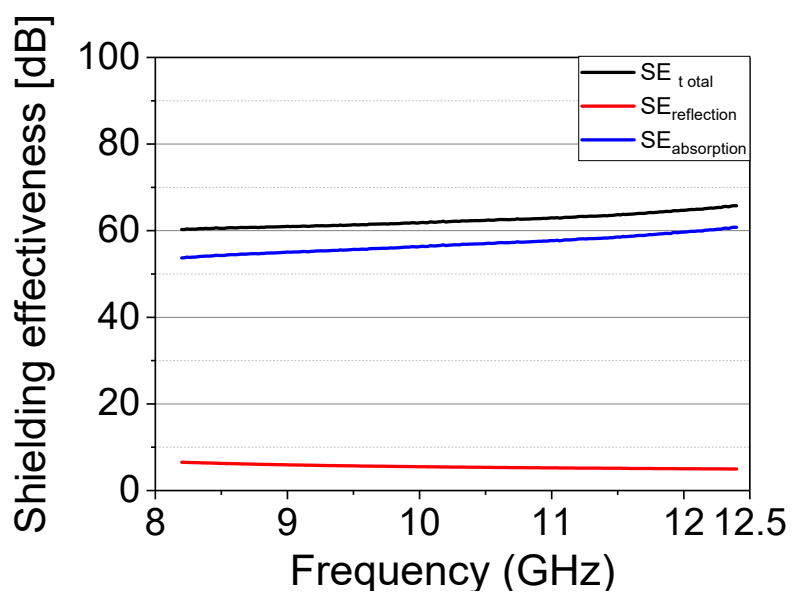

Figure S8. EMI-SE of nylon composite (One time pressed)

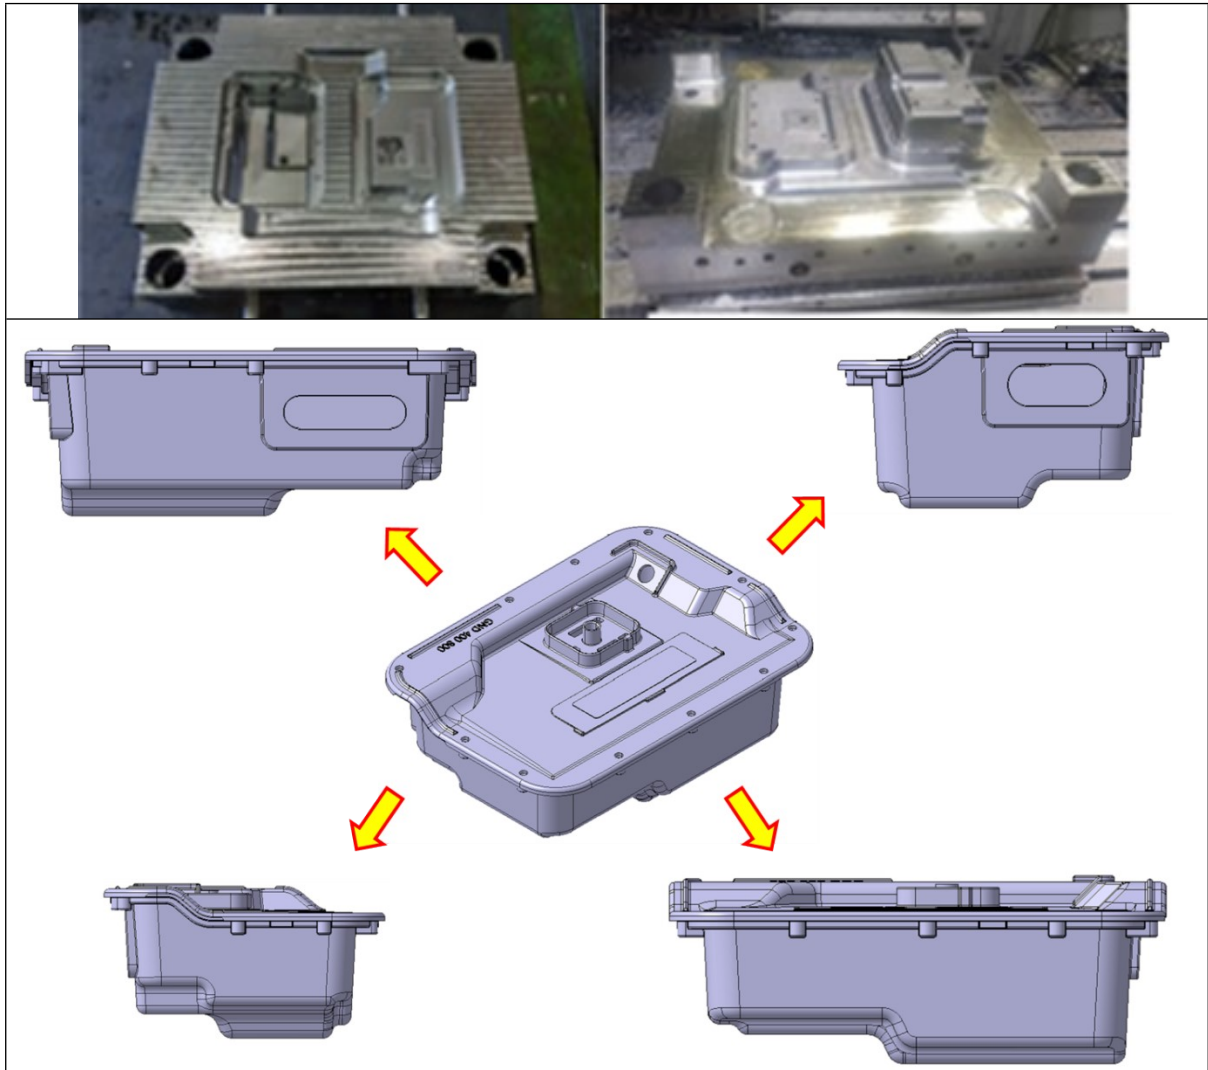

**Figure S9.** EMI-SE cover for automobile parts.

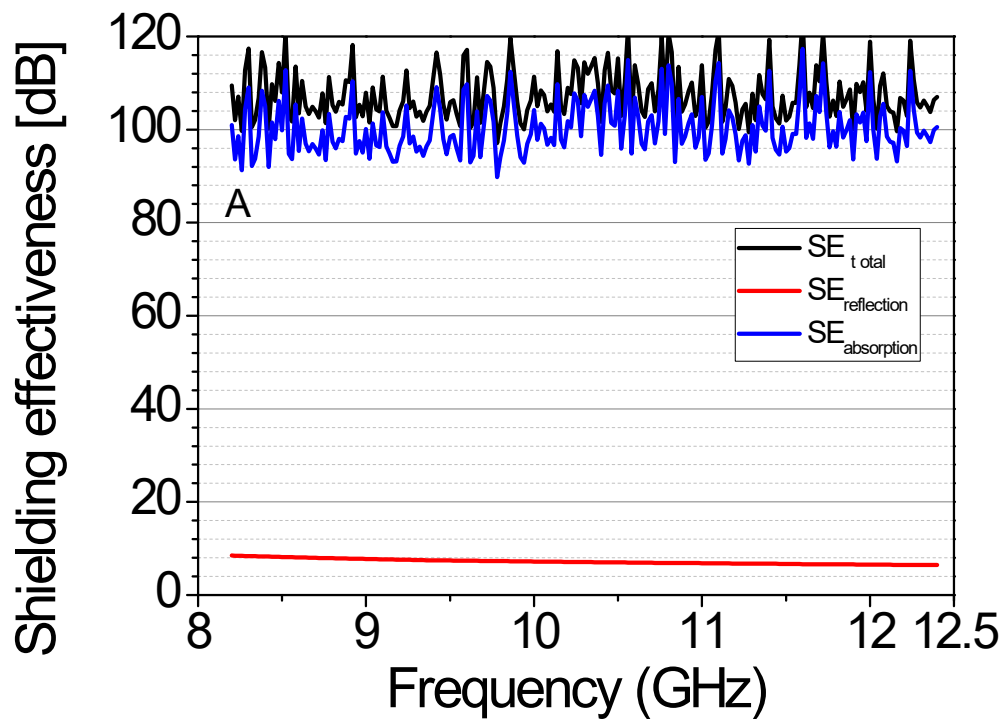

(a)

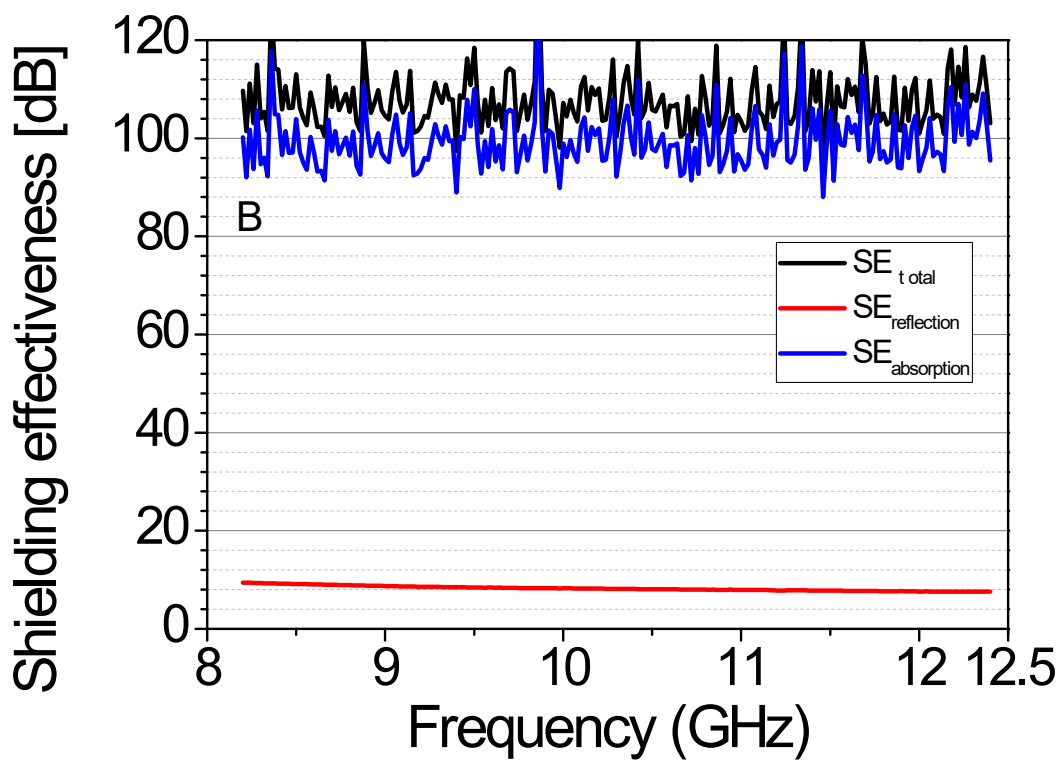

(b)

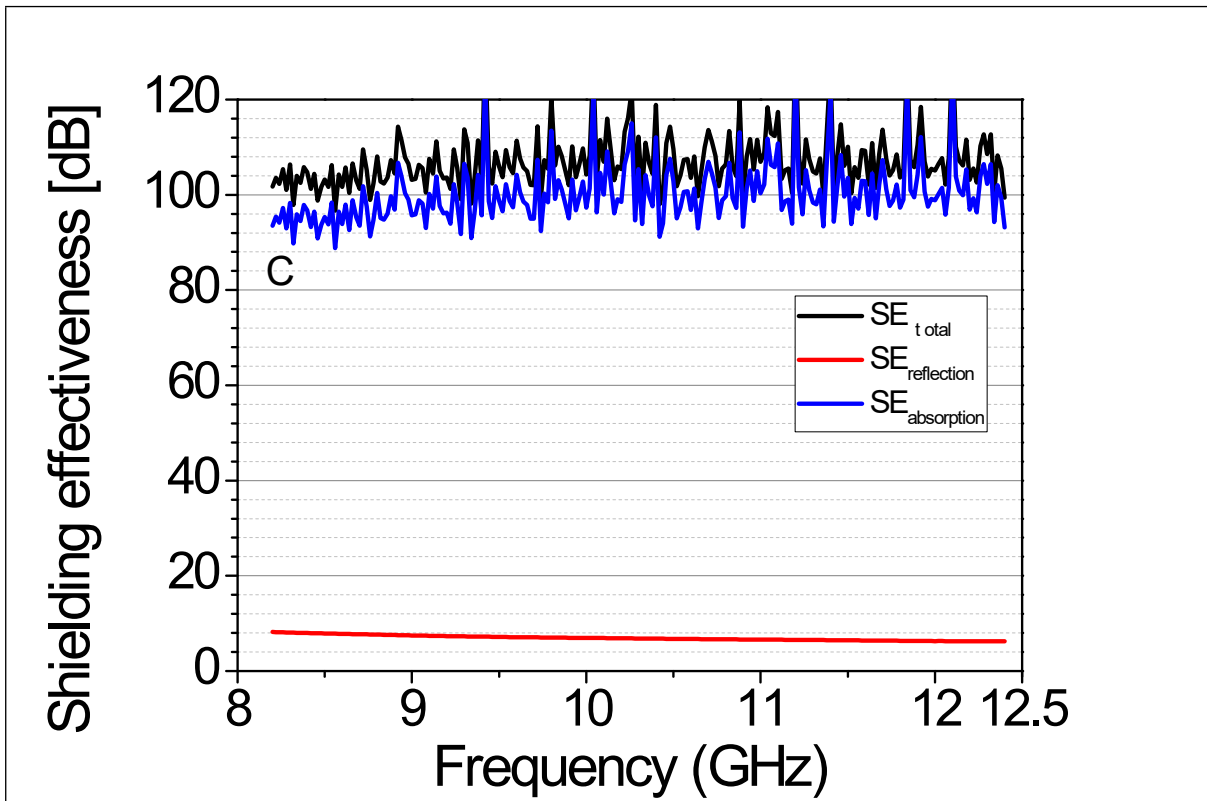

(c)

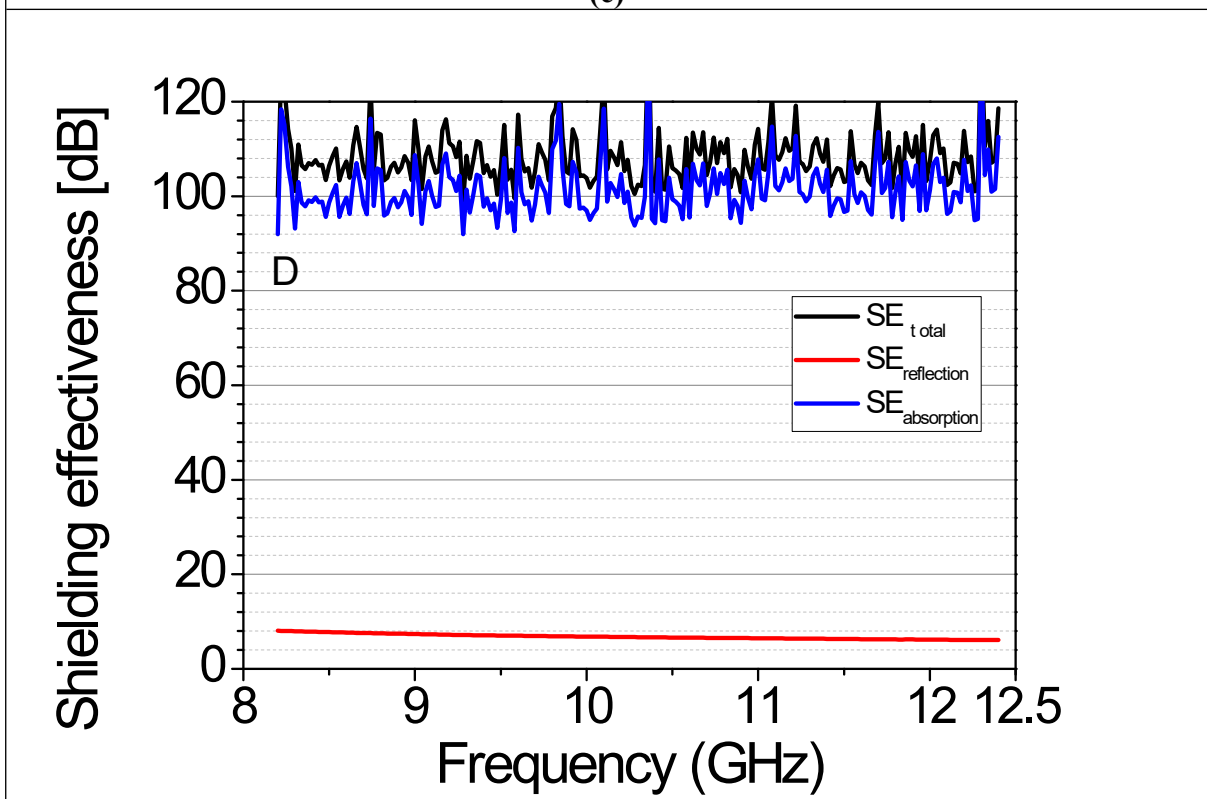

(d)

**Figure S10.** EMI- SE of composites with 5 mm thickness (a) NFCoT, (b) NFGT, (c) NGT, and (d) NGCu

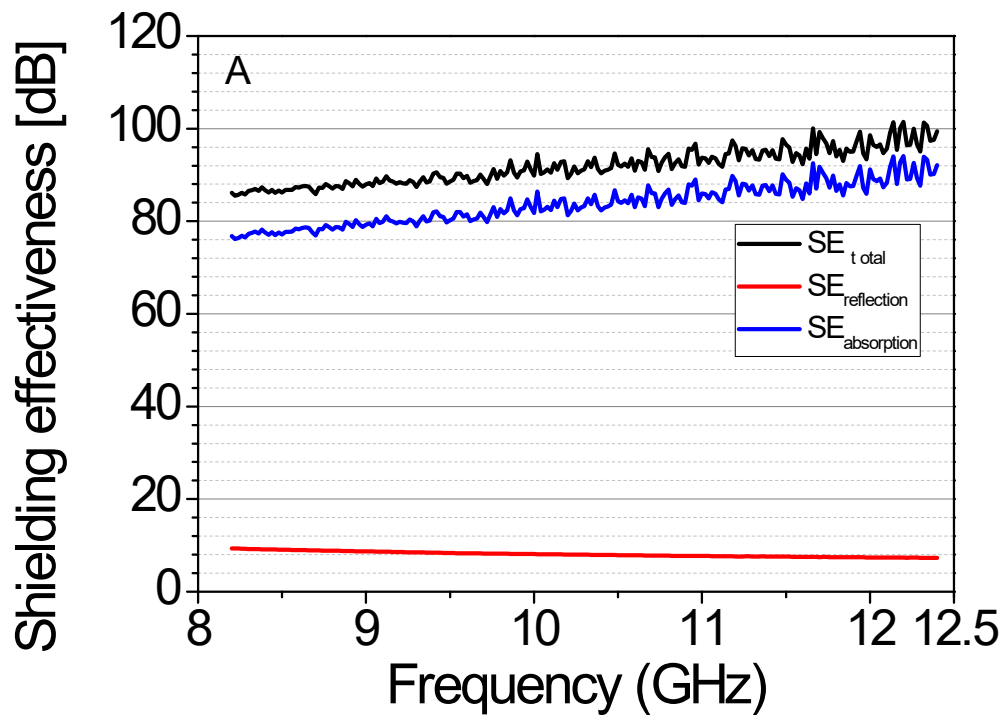

(a)

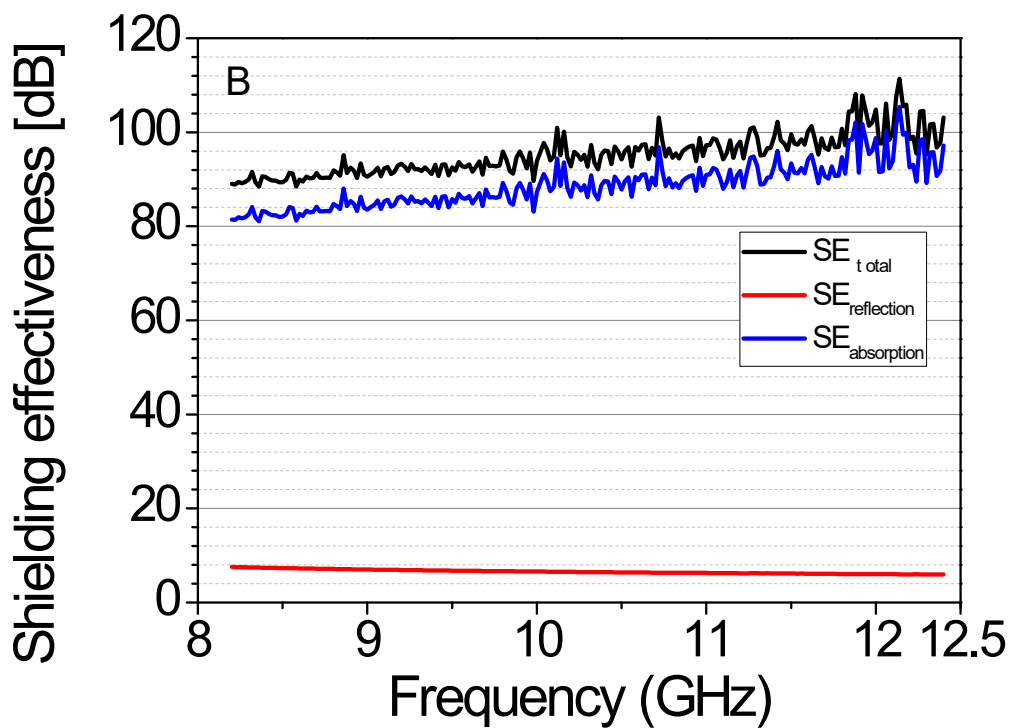

(b)

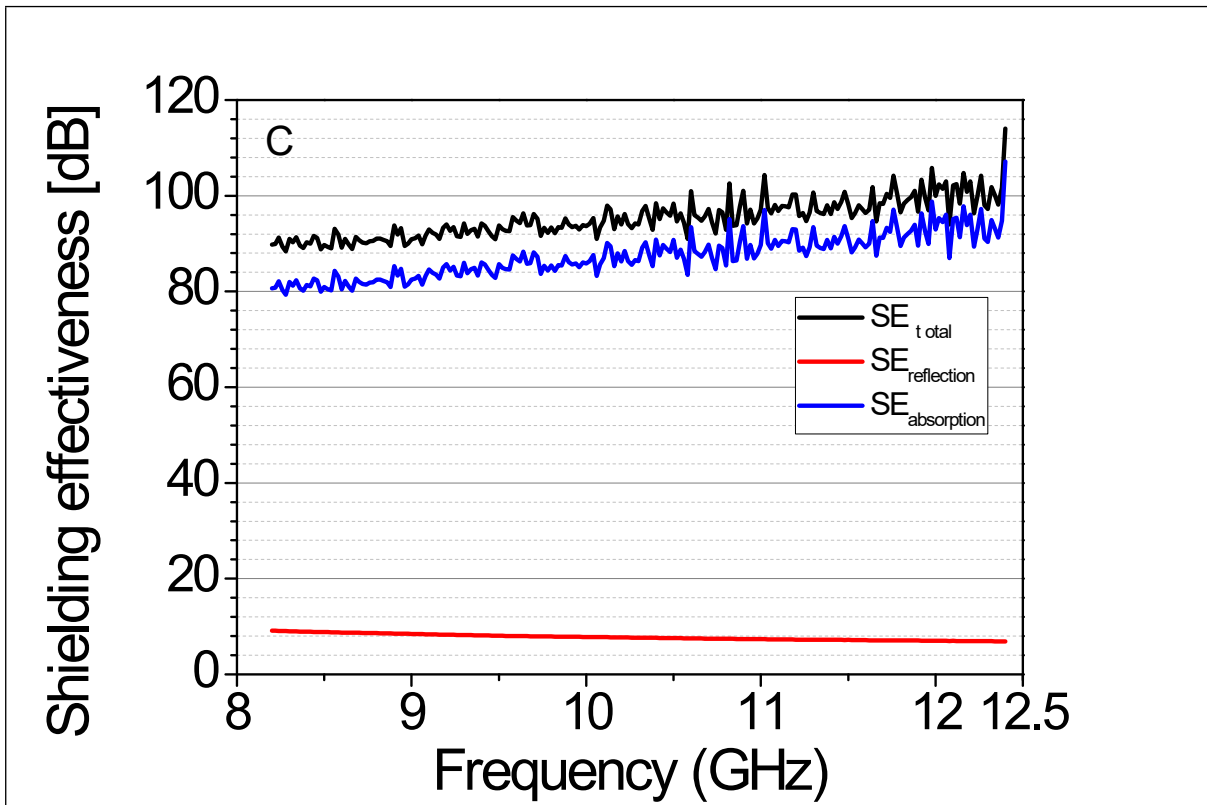

(c)

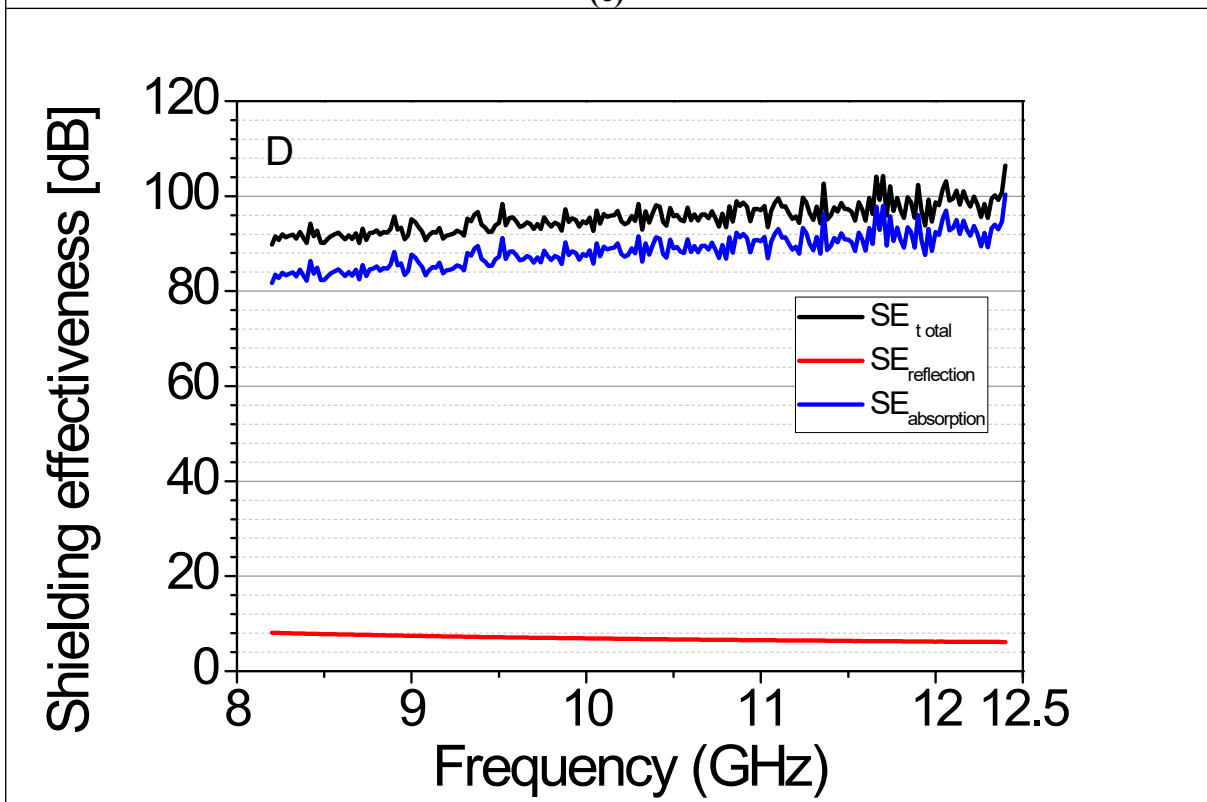

(d)

**Figure S11.** EMI- SE of composites with 4 mm thickness (a) NFCoT, (b) NFGT, (c) NGT, and (d) NGCu

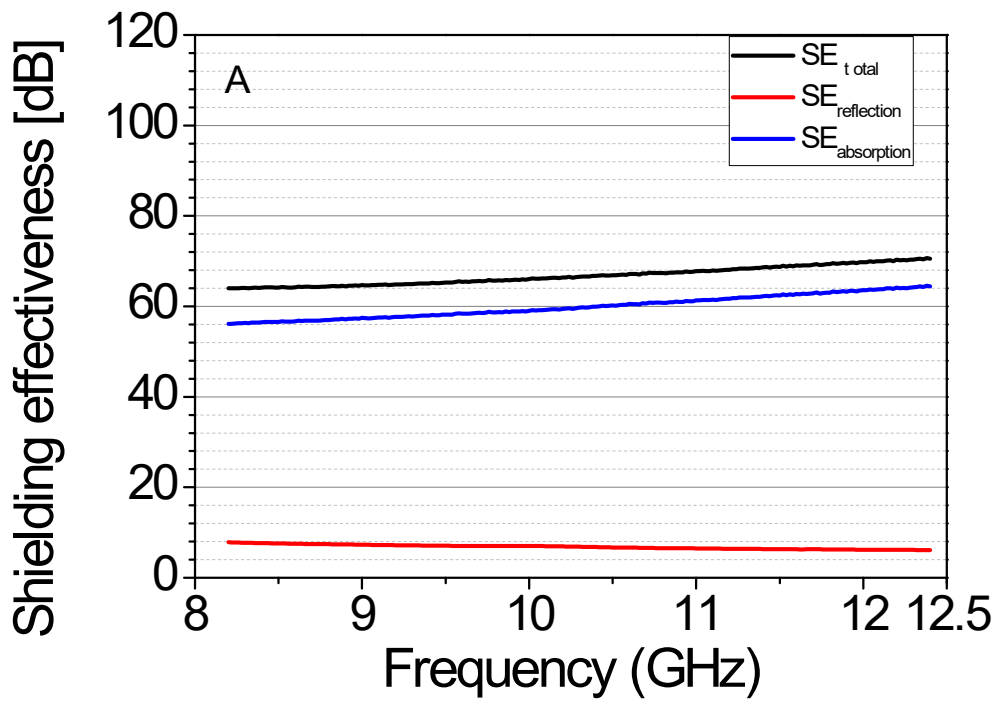

(a)

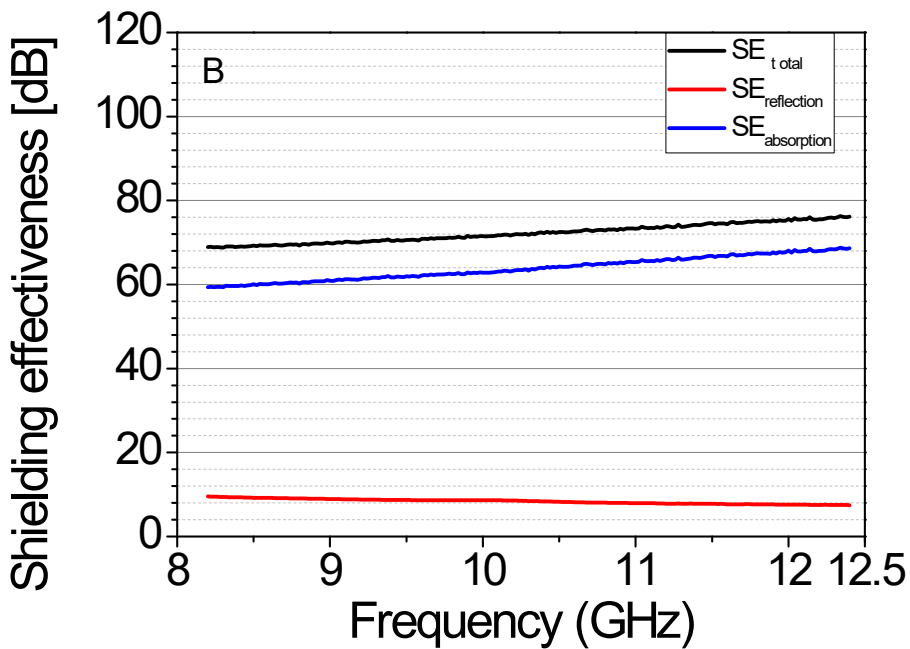

(b)



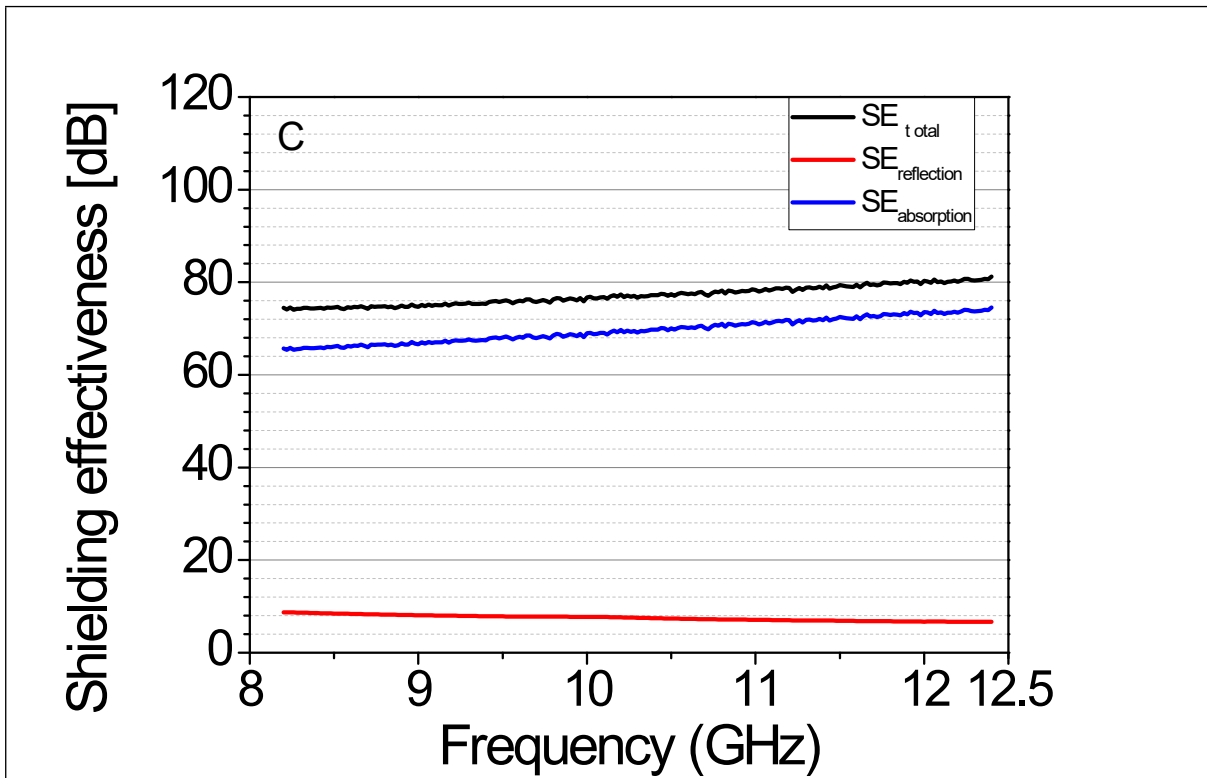

(c)

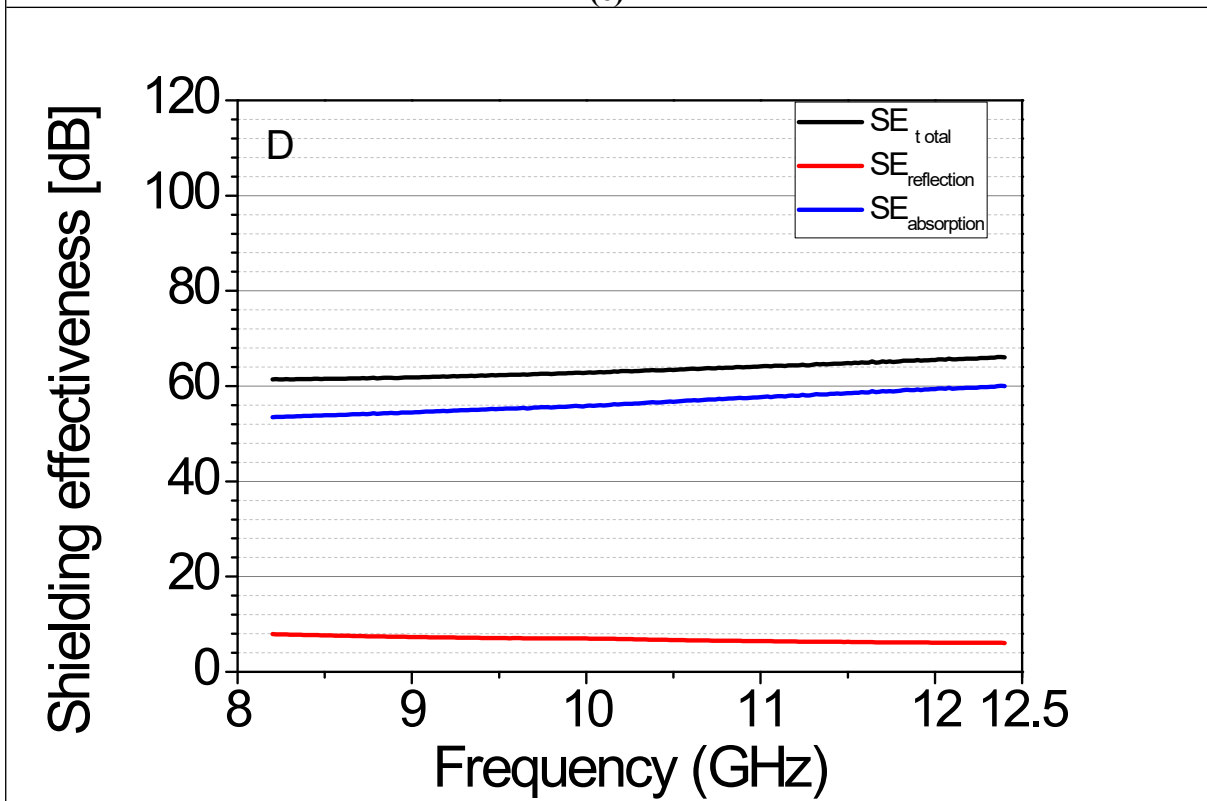

(d)

**Figure S12.** EMI- SE of composites with 3 mm thickness (a) NFCoT, (b) NFGT, (c) NGT, and (d) NGCu

### 3. Tables

**Table S1.** Comparison of total EMI shielding of PP composites ( $SE_T$ )

| $SE_T$         | GFGM APP (1)    | GFCFG MAPP (2) | GFCFFe GMAPP (3) | GFCFGMAPP+GFCFFeGMAPP (2+3) | GFGMAPP+GFCFGMAPP+GFCFFeGMAPP (1+2+3) |
|----------------|-----------------|----------------|------------------|-----------------------------|---------------------------------------|
| Max            | 75.18           | 65.08          | 72.18            | 120.11                      | 120.55                                |
| Ave            | 72.757<br>69076 | 61.89          | 68.938           | 101.27                      | 102.97                                |
| Mini           | 71.715          | 59.99          | 66.29            | 91.97                       | 94.53                                 |
| Efficiency (%) | 99.999<br>99697 | 99.9999<br>689 | 99.99999<br>395  | ~100                        | ~100                                  |
| Thickness (mm) | 4.06            | 4.67           | 2.56             | 7.23                        | 11.29                                 |

**Table S2.** Comparison of  $SE_A$  of PP composites

| $SE_A$ | GFGM APP (1) | GFCFGM APP (2) | GFCFFe GMAPP (3) | GFGMAPP+GFCFGMAPP (1+2) | GFGMAPP+GFCFGMAPP+GFCFFeGMAPP (1+2+3) |
|--------|--------------|----------------|------------------|-------------------------|---------------------------------------|
| Max    | 69.97        | 62.19          | 67.39            | 113.36                  | 113.52                                |
| Ave    | 67.05        | 58.28          | 63.95            | 94.8                    | 96.49                                 |
| Min    | 65.10        | 55.22          | 61.08            | 84.59                   | 88.17                                 |

**Table S3.** Comparison of  $SE_R$  of PP composites

| $SE_R$ | GFGM APP (1) | GFCFG MAPP (2) | GFCFFeGMAPP (3) | GFGMAPP+GFCFGMAPP (1+2) | GFGMAPP+GFCFGMAPP+GFCFFeGMAPP (1+2+3) |
|--------|--------------|----------------|-----------------|-------------------------|---------------------------------------|
| Max    | 6.68         | 4.79           | 5.73            | 7.38                    | 7.40                                  |
| Ave    | 5.71         | 3.63           | 4.99            | 6.47                    | 6.47                                  |
| Min    | 5.19         | 2.88           | 4.78            | 5.60                    | 5.59                                  |

Total EMI-SE (SE)

**Table S4.** Comparison of SE<sub>T</sub> of Nylon composites

| Comp<br>o<br>sites | SE        |           |           |           |           |      |           |          |      |          |          |      |
|--------------------|-----------|-----------|-----------|-----------|-----------|------|-----------|----------|------|----------|----------|------|
|                    | Thickness |           |           |           |           |      |           |          |      |          |          |      |
|                    | 6 mm      |           |           | 5 mm      |           |      | 4 mm      |          |      | 3 mm     |          |      |
|                    | max       | Ave       | Mini      | max       | Ave       | Mini | max       | Ave      | Mini | max      | Ave      | Mini |
| NFCo<br>T          | 132.<br>9 | 108.<br>4 | 99.8      | 123.<br>9 | 107.<br>5 | 97.1 | 101.<br>4 | 91.8     | 85.5 | 70.<br>7 | 66.<br>8 | 63.9 |
| NFGT               | 132.<br>4 | 108.<br>9 | 97.0<br>5 | 139.<br>1 | 107.<br>7 | 95.8 | 111.<br>4 | 95.<br>3 | 88.5 | 76.<br>3 | 72.<br>2 | 68.8 |
| NGT                | 129.<br>4 | 108.<br>7 | 98.9      | 132.<br>6 | 107.<br>1 | 96.7 | 114.<br>1 | 95.2     | 88.4 | 81.<br>2 | 77.<br>2 | 74.1 |
| NGCu               | 138.<br>8 | 108.<br>2 | 97.9      | 136       | 108.<br>4 | 99.1 | 106.<br>5 | 95.4     | 89.8 | 66.<br>1 | 63.<br>4 | 61.4 |

**Table S5.** Comparison of SE<sub>R</sub> of Nylon composites

| Compo<br>sites | SE <sub>R</sub> |     |      |      |      |      |      |     |      |      |     |      |
|----------------|-----------------|-----|------|------|------|------|------|-----|------|------|-----|------|
|                | Thickness       |     |      |      |      |      |      |     |      |      |     |      |
|                | 6 mm            |     |      | 5 mm |      |      | 4 mm |     |      | 3 mm |     |      |
|                | max             | Ave | Mini | max  | Ave  | Mini | max  | Ave | Mini | max  | Ave | Mini |
| NFCoT          | 9.7             | 8.4 | 7.5  | 9.5  | 7.2  | 6.4  | 9.4  | 8.1 | 7.3  | 7.9  | 6.8 | 6.1  |
| NFGT           | 9.7             | 8.3 | 7.6  | 9.4  | 8.3  | 7.6  | 7.6  | 6.6 | 5.9  | 9.5  | 8.4 | 7.5  |
| NGT            | 7.9             | 6.8 | 6.1  | 8.2  | 6.9  | 6.2  | 9.1  | 7.8 | 6.9  | 8.8  | 7.5 | 6.7  |
| NGCu           | 9.9             | 7.7 | 6.9  | 8.1  | 6.82 | 6.1  | 8.1  | 6.9 | 6.1  | 7.9  | 6.8 | 6.1  |

**Table S6.** Comparison of SE<sub>A</sub> of Nylon composites

| Comp<br>o<br>sites | SE <sub>A</sub> |           |      |           |           |      |           |          |      |          |          |      |
|--------------------|-----------------|-----------|------|-----------|-----------|------|-----------|----------|------|----------|----------|------|
|                    | Thickness       |           |      |           |           |      |           |          |      |          |          |      |
|                    | 6 mm            |           |      | 5 mm      |           |      | 4 mm      |          |      | 3 mm     |          |      |
|                    | max             | Ave       | Mini | max       | Ave       | Mini | max       | Ave      | Mini | max      | Ave      | Mini |
| NFCo<br>T          | 123.<br>5       | 99.9      | 91.3 | 117.<br>3 | 100.<br>3 | 89.8 | 94.1      | 83.<br>7 | 76.2 | 64.<br>6 | 59.<br>9 | 56.2 |
| NFGT               | 124.<br>8       | 100.<br>6 | 87.9 | 130.<br>8 | 99.4      | 88.0 | 105.<br>4 | 88.<br>7 | 81.1 | 68.<br>8 | 63.<br>8 | 59.4 |
| NGT                | 122.<br>5       | 101.<br>9 | 92.4 | 126.<br>1 | 100.<br>2 | 88.8 | 107.<br>1 | 87.<br>4 | 79.4 | 74.<br>5 | 69.<br>6 | 65.4 |
| NGCu               | 131.<br>6       | 100.<br>5 | 90.9 | 129.<br>3 | 101.<br>5 | 91.9 | 100.<br>3 | 88.<br>5 | 81.7 | 60       | 56.<br>6 | 53.5 |

**Table S7.** Comparison of EMI shielding of the composites

| No | Composition                                        | Filler (%) | Thickness (mm) | EMI-SE (dB) | SE/d (dB/mm) | Ref.         |
|----|----------------------------------------------------|------------|----------------|-------------|--------------|--------------|
| 1  | Segregated Graphene/<br>Polypropylene              | 10         | 0.9 mm         | 19.3        | 21.44        | 1            |
| 2  | Polypropylene/conductive fiber                     | 20         | 2 mm           | 43          | 21.50        | 2            |
| 3  | Carbon black/polypropylene (PP)                    | 10         | 2.8 mm         | 42.7        | 15.25        | 3            |
| 4  | RGO/PP                                             | 1.83       | 0.7 mm         | 29.3        | 41.86        | 4            |
| 5  | Carbon fiber/PP                                    | 10         | 3.2 mm         | 25          | 7.81         | 5            |
| 6  | Ti <sub>3</sub> C <sub>2</sub> T <sub>x</sub> /PP  | 2.12       | 1.93 mm        | 66          | 34.19        | 5            |
| 7  | Ti <sub>3</sub> C <sub>2</sub> T <sub>x</sub> /PP  | 1.78       | 1.93 mm        | 55          | 28.50        | 5            |
| 8  | Ti <sub>3</sub> C <sub>2</sub> T <sub>x</sub> /wax | 90         | 1 mm           | 32          | 32           | 5            |
| 9  | CNT/PU                                             | 20         | 2 mm           | 17          | 8.5          | 5            |
| 10 | Segregated CNT/PP                                  | 3.5        | 2 mm           | 32          | 16           | 6            |
| 11 | Epoxy Cu-nanowires/<br>GN aerogel                  | 7.2        | 2 mm           | 47          | 23.5         | 7            |
| 12 | GN foam/acrylonitrile butadiene<br>styrene         | 50         | 1.6 mm         | 42.4        | 26.5         | 8            |
| 13 | poly( $\epsilon$ -caprolactone)/MWCNT              | 50         | 2.4 mm         | 44          | 18.34        | 9            |
| 14 | Recyclable conductive<br>epoxy/CNT                 | 1          | 1.8 mm         | 22          | 12.23        | 10           |
| 15 | PP/carbon black foam                               | 30         | 60 mm          | 41          | 0.68         | 11           |
| 16 | Microwires-graphene/Silicone<br>elastomer (M/G/S)  | 0.0193     | 2 mm           | 18          | 9            | 12           |
| 17 | Bucky-paper/polyethylene                           | 38         | 0.025 mm       | 20          | 800          | 12           |
| 18 | PP/carbon fiber                                    | 20         | 2 mm           | -32.92      | -16.46       | 13           |
| 19 | PAN@SiO <sub>2</sub> -4wt%Ag-30min                 | 4          | 0.05 mm        | 22.68       | 533.6        | 14           |
| 20 | PAN@SiO <sub>2</sub> -4wt%Ag-12h-PFDT<br>film      | 4          | 0.05           | 81          | 1620         | 14           |
| 21 | Ni@nylon mesh/PP                                   | 3.07       | 2.5 mm         | 50.6        | 20.24        | 15           |
| 22 | Porous POM/MWCNT                                   | 10         | 2 mm           | 58.5        | 29.3         | 16           |
| 23 | Water-based Conductive Ink                         | 80         | 0.01 mm        | 74.5        | 7450         | 17           |
| 24 | GFGMAPP(1)                                         | 13         | 4.06 mm        | 75.18       | 18.52        | This<br>work |
| 25 | GFCFGMAPP (2)                                      | 13         | 4.67 mm        | 65.08       | 13.94        |              |
| 26 | GFCFFeGMAPP (3)                                    | 13         | 2.56 mm        | 72.18       | 28.20        |              |
| 27 | 1+2                                                | 13         | 7.23           | 120.11      | 16.61        |              |
| 28 | 1+2+3                                              | 13         | 11.29          | 120.55      | 10.68        |              |
| 29 | NFCoT                                              | 13         | 6 mm           | 132.9       | 22.15        |              |
| 30 | NFGT                                               | 13         | 6 mm           | 132.4       | 22.07        |              |
| 31 | NGT                                                | 13         | 6 mm           | 129.4       | 21.57        |              |
| 32 | NGCu                                               | 13         | 6 mm           | 138.8       | 23.14        |              |

References

1. Alam, F.E., Yu, J., Shen, D., Dai, W., Li, H., Zeng, X., Yao, Y., Du, S., Jiang, N. and Lin, C.T., 2017. Highly conductive 3D segregated graphene architecture in polypropylene composite with efficient EMI shielding. *Polymers*, 9(12), p.662.
2. Lee PC, Kim BR, Jeoung SK, Kim YK. Electromagnetic interference shielding effectiveness of polypropylene/conducting fiber composites. In *AIP Conference Proceedings* 2016 Mar 9 (Vol. 1713, No. 1, p. 120015). AIP Publishing LLC.
3. Al-Saleh, M.H. and Sundararaj, U., 2012. X-band EMI shielding mechanisms and shielding effectiveness of high structure carbon black/polypropylene composites. *Journal of Physics D: Applied Physics*, 46(3), p.035304.
4. Sun, T., Luo, W., Luo, Y., Wang, Y., Zhou, S., Liang, M., Chen, Y. and Zou, H., 2020. Self-Reinforced Polypropylene/Graphene Composite with Segregated Structures To Achieve Balanced Electrical and Mechanical Properties. *Industrial & Engineering Chemistry Research*, 59(24), pp.11206-11218.
5. Xu, M.K., Liu, J., Zhang, H.B., Zhang, Y., Wu, X., Deng, Z. and Yu, Z.Z., 2021. Electrically Conductive Ti<sub>3</sub>C<sub>2</sub>T<sub>x</sub> MXene/Polypropylene Nanocomposites with an Ultralow Percolation Threshold for Efficient Electromagnetic Interference Shielding. *Industrial & Engineering Chemistry Research*, 60(11), pp.4342-4350.
6. Zhang, Y.P., Zhou, C.G., Sun, W.J., Wang, T., Jia, L.C., Yan, D.X. and Li, Z.M., 2020. Injection molding of segregated carbon nanotube/polypropylene composite with enhanced electromagnetic interference shielding and mechanical performance. *Composites Science and Technology*, 197, p.108253.
7. Yang, X., Fan, S., Li, Y., Guo, Y., Li, Y., Ruan, K., Zhang, S., Zhang, J., Kong, J. and Gu, J., 2020. Synchronously improved electromagnetic interference shielding and thermal conductivity for epoxy nanocomposites by constructing 3D copper nanowires/thermally annealed graphene aerogel framework. *Composites Part A: Applied Science and Manufacturing*, 128, p.105670.
8. Wang, L., Wu, Y., Wang, Y., Li, H., Jiang, N. and Niu, K., 2020. Laterally compressed graphene foam/acrylonitrile butadiene styrene composites for electromagnetic interference shielding. *Composites Part A: Applied Science and Manufacturing*, 133, p.105887.
9. Tang, X.H., Li, J., Tan, Y.J., Cai, J.H., Liu, J.H. and Wang, M., 2020. Achieve high performance microwave shielding in poly ( $\epsilon$ -caprolactone)/multi-wall carbon nanotube composites via balancing absorption in conductive domains and multiple scattering at interfaces. *Applied Surface Science*, 508, p.145178.
10. Yuan, D., Guo, H., Ke, K. and Manas-Zloczower, I., 2020. Recyclable conductive epoxy composites with segregated filler network structure for EMI shielding and strain sensing. *Composites Part A: Applied Science and Manufacturing*, 132, p.105837.
11. Li, Y., Lan, X., Wu, F., Liu, J., Huang, P., Chong, Y., Luo, H., Shen, B. and Zheng, W., 2020. Steam-chest molding of polypropylene/carbon black composite foams as broadband EMI shields with high absorptivity. *Composites Communications*, 22,

p.100508.

12. Xu, Y.L., Uddin, A., Estevez, D., Luo, Y., Peng, H.X. and Qin, F.X., 2020. Lightweight microwire/graphene/silicone rubber composites for efficient electromagnetic interference shielding and low microwave reflectivity. *Composites Science and Technology*, 189, p.108022.
13. Kaushal, A. and Singh, V., 2020. Development of lightweight polypropylene/carbon fiber composites for its application in shielding of electromagnetic interference in X-band. *Journal of Materials Science: Materials in Electronics*, 31(17), pp.14088-14100.
14. Li, T.T., Wang, Y., Peng, H.K., Zhang, X., Shiu, B.C., Lin, J.H. and Lou, C.W., 2020. Lightweight, flexible and superhydrophobic composite nanofiber films inspired by nacre for highly electromagnetic interference shielding. *Composites Part A: Applied Science and Manufacturing*, 128, p.105685.
15. Li, S., Xu, Z., Dong, Y., Liu, D. and Sui, G., 2020. Ni@ nylon mesh/PP composites with a novel tree-ring structure for enhancing electromagnetic shielding. *Composites Part A: Applied Science and Manufacturing*, 131, p.105798.
16. Li, J., Chen, J.L., Tang, X.H., Cai, J.H., Liu, J.H. and Wang, M., 2020. Constructing nanopores in poly (oxymethylene)/multi-wall carbon nanotube nanocomposites via poly (l-lactide) assisting for improving electromagnetic interference shielding. *Journal of colloid and interface science*, 565, pp.536-545.
17. Jia, L.C., Zhou, C.G., Sun, W.J., Xu, L., Yan, D.X. and Li, Z.M., 2020. Water-based conductive ink for highly efficient electromagnetic interference shielding coating. *Chemical Engineering Journal*, 384, p.123368.
